# Supplementary material for: Edgetic perturbation models of human inherited disorders
Source: PubMed Central journal article supplement — Mol Syst Biol. 2009 Nov 3;5:321. doi: 10.1038/msb.2009.80 (PMC2795474; doi:10.1038/msb.2009.80), 2009-11-03
Supplement: msb200980-s1.pdf [file msb200980-s1.pdf]

## ONLINE SUPPLEMENTARY MATERIAL FOR

### **Edgetic perturbation models of human inherited disorders**

Quan Zhong<sup>1,\*</sup>, Nicolas Simonis<sup>1,\*</sup>, Qian-Ru Li<sup>1,\*</sup>, Benoit Charlotiaux<sup>1,2,\*</sup>, Fabien Heuze<sup>1,2,\*</sup>, Niels Klitgord<sup>1,\*</sup>, Stanley Tam<sup>1</sup>, Haiyuan Yu<sup>1</sup>, Kavitha Venkatesan<sup>1</sup>, Danny Mou<sup>1</sup>, Venus Swearingen, Muhammed A Yildirim<sup>1</sup>, Han Yan<sup>1</sup>, Amélie Dricot<sup>1</sup>, David Szeto<sup>1</sup>, Chenwei Lin<sup>1</sup>, Tong Hao<sup>1</sup>, Changyu Fan<sup>1</sup>, Stuart Milstein<sup>1</sup>, Denis Dupuy<sup>1</sup>, Robert Brasseur<sup>2</sup>, David E Hill<sup>1</sup>, Michael E Cusick<sup>1</sup> & Marc Vidal<sup>1</sup>

<sup>1</sup>Center for Cancer Systems Biology (CCSB) and Department of Cancer Biology, Dana-Farber Cancer Institute, and Department of Genetics, Harvard Medical School, 44 Binney Street, Boston, Massachusetts 02115, USA. <sup>2</sup>Centre de Biophysique Moléculaire Numérique, Faculté Universitaire des Sciences Agronomiques de Gembloux, 2 Passage des Déportés, B-5030 Gembloux, Wallonia, Belgium. \*These authors contributed equally to this work. Correspondence should be addressed to M.V. (marc\_vidal@dfci.harvard.edu).

This PDF includes:

Supplementary Text (Text, Reference, Supplementary Figure legends)

Supplementary Figures (Figure S1-9)

Supplementary Tables (Table S1-4)

## SUPPLEMENTARY TEXT

### **CBS (cystathionine $\beta$ -synthase)**

Enzyme deficiency caused by mutations in *CBS* gives rise to the metabolic disorder Homocystinuria. Five disease-causing mutant alleles from HGMD, distributed along the coding sequence of *CBS*, were cloned and tested for interactions against three interactors of the respective wild-type protein (Rual *et al.*, 2005) (Figure S2A). Several classes of interaction-defective alleles were identified. One allele (I278T) behaved as a null, eliminating all three interactions. Two (P49L and P422L) behaved as “pseudo-wild-type”, retaining all three protein-protein interactions. The other two alleles (P145L and L539S) have one Y2H interaction retained while two other interactions lost.

Three-dimensional structural information is available for *CBS* (Meier *et al.*, 2001). The null-like allele (I278T) has non-conservative amino acid substitutions in the highly structured internal region of the protein, possibly grossly disrupting protein conformation. The allele with partial loss of protein interaction (P145L) and the wild-type-like allele (P49L) are on the surface (Figure S2B). Pro49 locates near the heme-binding residues Cys52 and His65. Given the unique conformational rigidity of proline, the P49L mutation might affect enzyme function via perturbation of the heme-binding pocket.

The P422L mutant allele fully preserves enzyme activity (Figure S2D), consistent with its wild-type-like Y2H interaction profile. Both the null-like I278T allele and the edgetic P145L allele exhibit nearly complete loss of enzyme activity (Figure S2D). The former (I278T) likely results from grossly disrupt

protein, while the latter (P145L) is likely caused by defective dimerization as observed in the Y2H analysis.

Allele-specific perturbations of CBS mutant proteins were found to be associated with a treatment response. Pyridoxine, a precursor of the CBS cofactor pyridoxal phosphate (PLP), alleviates CBS deficiency and reduces the associated disease symptoms (Mudd *et al.*, 1985). Not all patients respond to pyridoxine. A patient with the wild-type-like P422L allele is not pyridoxine responsive (Maclean *et al.*, 2002), suggesting that increased PLP cofactor does not enhance CBS enzyme activity of alleles with presumably largely unaffected structure. Patients carry the alleles with partial loss of protein interactions, P145L (Kozich *et al.*, 1993) or L539S (Aral *et al.*, 1997), are pyridoxine responsive, consistent with partially perturbed protein structures that may be stabilized by cofactor binding. Some patients with the null-like I278T allele are reportedly pyridoxine responsive (Kluijtmans *et al.*, 1999). However, it was recently suggested that the mechanism of pyridoxine responsiveness in I278T patients may involve mechanisms besides direct enhancement of CBS activity by PLP (Chen *et al.*, 2006). The null-like interaction profile of I278T also supports a grossly altered structure, unlikely to be directly restored by cofactor binding.

### **HGD (homogenistate dioxygenase)**

Mutations in *HGD* give rise to Alkaptonuria, a benign inborn error of metabolism characterized by excess homogentisic acid in body fluids, causing several symptoms including “black urine” (Garrod, 1902; Phornphutkul *et al.*, 2002). Five

disease-causing mutant alleles from HGMD distributed along the coding sequence of HGD were cloned and tested for interactions against three interactors of the respective wild-type protein identified in our screen (HGD, NUDT18, NIF3L1) (Figure S3A). We found a similar distribution of allele classes: alleles that are null with respect to all tested protein-protein interactions (V300G and E42A), a pseudo-wild-type allele (H371R), and alleles causing interaction-specific perturbation to HGD (R225H and L25P) (Figure S3A).

Three-dimensional structure is available for HGD (Titus *et al.*, 2000). Similar to CBS, the null-like allele (V300G) also has non-conservative amino acid substitutions in the highly structured internal regions of the protein (Figure S3B), possibly grossly disrupting protein conformation. The other null allele (E42A) likely causes defects in HGD oligomerization, since the E42 residue forms a salt-bridge with the three-fold related Arg336 in the HGD hexamer. Both null alleles (V300G and E42A) have dramatically loss of enzyme activity (Figure S3D). Alleles causing interaction-specific defects (R225H and L25P) correspond to mutated residues on the surface of the protein (Figure S3B). The Arg225 and Leu25 residues participate in the dimerization of HGD trimers. Substitution of these residues by His and Pro, respectively, should not affect trimerization of the hexamer, given the nature of the substitutions and of the two-fold interface of HGD oligomer. The edgetic allele (R225H) with nearly complete loss of enzyme activity (Figure S3D) showed clearly reduced dimerization in the Y2H analysis (Figure S3A), possibly leading to defective hexamer formation. The pseudo-wild-type allele (H371R) also has mutated residues on the surface (Figure S3B). The

side chain of His371 directly coordinates the cofactor  $\text{Fe}^{2+}$ . Therefore the H371R mutant allele is likely defective for ligand binding leading to loss of enzyme activity (Figure S3D) (Rodriguez *et al.*, 2000).

### **ACTG1 (cytoplasmic $\gamma$ -actin)**

Five mutations in *ACTG1* are associated with progressive, sensorineural hearing loss as annotated in HGMD. Profiling of deafness-associated *ACTG1* alleles revealed wild-type-like and interaction-specific perturbations. Three *ACTG1* alleles (T89I, K118M, and T278I) retain all wild-type interactions (Figure S4A). Of these, Thr89 and Thr278 are completely buried in the structure of the ortholog bovine  $\beta$ -actin (Chik *et al.*, 1996), and the K118M substitution modifies the physicochemical properties of the solvent-exposed Lys118 residue (Figure S4B). The lack of interaction defects in these disease-causing alleles may simply result from the few interactions that were analyzed. Thr89 is implicated in an interaction with an actin bundling protein, fimbrin (Adams and Botstein, 1989), but this interaction was not tested here. Two mutations (P264L and P332A) show severe interaction defects with actin depolymerizing factors (CFL1, CFL2, and DSTN) (Figure S4A), suggesting defective actin dynamics leading to hearing loss. Pro264 is buried in the bovine  $\beta$ -actin structure (Figure S4B), mutation of which likely results in structural alterations. Pro332 is surface exposed (Figure S4B) and falls into one of the five biochemically identified peptide stretches (328-338) that mediate binding of actin to cofilin (Mannherz *et al.*, 2007). All five *ACTG1* mutant alleles preserve interactions with wild-type  $\beta$ -actin (ACTB) and  $\gamma$ -actin

(ACTG1) (Figure S4A), consistent with possible incorporation of mutant monomers in actin filaments *in vivo*, causing dominant negative effects.

#### **CDK4 (cyclin dependent kinase 4)**

CDK4 controls cell cycle progression and is negatively regulated by cyclin-dependent kinase inhibitors (Ortega *et al.*, 2002). Four *CDK4* germline mutations are annotated in HGMD with increased risk of melanoma. All four *CDK4* mutant alleles were cloned and tested for interactions against three previously identified interactors (Rual *et al.*, 2005), and another known *CDK4* inhibitor available in our human ORFeome collection (Lamesch *et al.*, 2007), *CDKN2C* (cyclin-dependent kinase inhibitor 2C). Both R24H and R24C mutant alleles show reduced interaction with *CDKN2C* (Figure S5A), consistent with available crystallographic data and oncogenic activation of *CDK4*. The other two mutations (N41S and S52N) affect residues in the vicinity of cyclin binding site but do not make direct contact with D-type cyclin in the crystal structures (Day *et al.*, 2009) (Figure S5B). N41S was found in the germline of a patient with no family history of melanoma (Guldberg *et al.*, 1997). S52N was found in a family with a history of melanoma but this mutation is not carried by all affected individuals (Holland *et al.*, 1999). The conservative nature of these mutations and their unaffected interaction profile in Y2H strongly suggest that the pathological relevance for these two alleles is uncertain. To test the possibility that *CDK4* mutant alleles may gain new interactions, we carried out Y2H screens for both the wild-type and four mutant *CDK4* proteins against a set of ~12,200 human open reading frames

(Lamesch *et al.*, 2007). However, at this stage we did not recover any gain-of-interaction for any of the four mutant CDK4 proteins yet.

### **PRKAR1A (cAMP-dependent protein kinase type I $\alpha$ regulatory subunit)**

Mutations in *PRKAR1A* are associated with Carney complex, a multiple neoplasia syndrome. About 90% of *PRKAR1A* mutations recorded in HGMD result in premature stop codons or frameshifts (9 nonsense, 1 missense, 4 in-frame and 26 out-of-frame insertions or deletions, and 12 splice site mutations). *PRKAR1A* regulates one of the two types of PKA, type I PKA. Reduced *PRKAR1A* levels likely perturb the balance between type I and type II PKA, leading to abnormal cell growth and proliferation (Stergiopoulos and Stratakis, 2003).

We cloned the one missense and nine nonsense *PRKAR1A* mutant alleles annotated in HGMD and tested them for interactions against three interactors of the wild-type *PRKAR1A* (Rual *et al.*, 2005). All fusion proteins carrying nonsense mutations exhibited dramatically reduced expression in yeast, whereas the missense R74C allele is normally expressed (Figure S6A), resembling the expression pattern of mutant *PRKAR1A* observed in patients (Kirschner *et al.*, 2000). Despite reduced expression, most mutant proteins preserved one or two wild-type interactions, except for Q28X and Q37X (Figure S6A). The two null-like alleles (Q28X and Q37X) truncate the N-terminal RII $\alpha$  domain of *PRKAR1A* (Figure S6B). The R42X mutant allele, located between the two helices of the helix-turn-helix RII $\alpha$  domain (Banky *et al.*, 2003), loses interactions with AKAP10

and PLEKHF2 but preserves the interaction with MGC13057 (Figure S6A). The expressed missense allele R74C and three nonsense alleles (K63X, Q304X and S307X) preserve the interaction with AKAP10 (Figure S6A), a kinase anchoring protein that binds both type I and type II PKA (Huang *et al.*, 1997b). This dual specificity of AKAP10 allows differential targeting of type I and type II PKA, crucial for integrated signaling (Huang *et al.*, 1997a). The interaction of PRKAR1A mutant proteins with AKAP10 could interfere with the binding of functional PKA to AKAP10 and cause additional imbalance between type I and type II PKA. Such an interaction could account for more severe phenotypes reported for patients with expressed mutant PRKAR1A (Horvath *et al.*, 2008).



## REFERENCES

- Adams, A. E., and Botstein, D. (1989). Dominant suppressors of yeast actin mutations that are reciprocally suppressed. *Genetics* 121, 675-683.
- Aral, B., Coude, M., London, J., Aupetit, J., Chasse, J. F., Zobot, M. T., Chadeaux-Vekemans, B., and Kamoun, P. (1997). Two novel mutations (K384E and L539S) in the C-terminal moiety of the cystathionine  $\beta$ -synthase protein in two French pyridoxine-responsive homocystinuria patients. *Hum Mutat* 9, 81-82.
- Banky, P., Roy, M., Newlon, M. G., Morikis, D., Haste, N. M., Taylor, S. S., and Jennings, P. A. (2003). Related protein-protein interaction modules present drastically different surface topographies despite a conserved helical platform. *J Mol Biol* 330, 1117-1129.
- Chen, X., Wang, L., Fazlieva, R., and Kruger, W. D. (2006). Contrasting behaviors of mutant cystathionine beta-synthase enzymes associated with pyridoxine response. *Hum Mutat* 27, 474-482.
- Chik, J. K., Lindberg, U., and Schutt, C. E. (1996). The structure of an open state of  $\beta$ -actin at 2.65 Å resolution. *J Mol Biol* 263, 607-623.
- Day, P. J., Cleasby, A., Tickle, I. J., O'Reilly, M., Coyle, J. E., Holding, F. P., McMenamin, R. L., Yon, J., Chopra, R., Lengauer, C., and Jhoti, H. (2009). Crystal structure of human CDK4 in complex with a D-type cyclin. *Proc Natl Acad Sci USA* 106, 4166-4170.
- Garrod, A. E. (1902). The incidence of alkaptonuria: a study in chemical individuality. *Lancet ii*, 1616-1620.
- Guldberg, P., Kirkin, A. F., Gronbaek, K., thor Straten, P., Ahrenkiel, V., and Zeuthen, J. (1997). Complete scanning of the *CDK4* gene by denaturing gradient gel electrophoresis: a novel missense mutation but low overall frequency of mutations in sporadic metastatic malignant melanoma. *Int J Cancer* 72, 780-783.
- Holland, E. A., Schmid, H., Kefford, R. F., and Mann, G. J. (1999). *CDKN2A* (P16<sup>INK4a</sup>) and *CDK4* mutation analysis in 131 Australian melanoma probands: effect of family history and multiple primary melanomas. *Genes Chromosomes Cancer* 25, 339-348.
- Horvath, A., Bossis, I., Giatzakis, C., Levine, E., Weinberg, F., Meoli, E., Robinson-White, A., Siegel, J., Soni, P., Groussin, L., Matyakhina, L., Verma, S., Remmers, E., Nesterova, M., Carney, J. A., Bertherat, J., and Stratakis, C. A. (2008). Large deletions of the *PRKAR1A* gene in Carney complex. *Clin Cancer Res* 14, 388-395.
- Huang, L. J., Durick, K., Weiner, J. A., Chun, J., and Taylor, S. S. (1997a). D-AKAP2, a novel protein kinase A anchoring protein with a putative RGS domain. *Proc Natl Acad Sci USA* 94, 11184-11189.
- Huang, L. J., Durick, K., Weiner, J. A., Chun, J., and Taylor, S. S. (1997b). Identification of a novel protein kinase A anchoring protein that binds both type I and type II regulatory subunits. *J Biol Chem* 272, 8057-8064.
- Jeffrey, P. D., Tong, L., and Pavletich, N. P. (2000). Structural basis of inhibition of CDK-cyclin complexes by INK4 inhibitors. *Genes Dev* 14, 3115-3125.

- Kirschner, L. S., Sandrini, F., Monbo, J., Lin, J. P., Carney, J. A., and Stratakis, C. A. (2000). Genetic heterogeneity and spectrum of mutations of the *PRKAR1A* gene in patients with the carney complex. *Hum Mol Genet* 9, 3037-3046.
- Kluijtmans, L. A., Boers, G. H., Kraus, J. P., van den Heuvel, L. P., Cruysberg, J. R., Trijbels, F. J., and Blom, H. J. (1999). The molecular basis of cystathionine  $\beta$ -synthase deficiency in Dutch patients with homocystinuria: effect of CBS genotype on biochemical and clinical phenotype and on response to treatment. *Am J Hum Genet* 65, 59-67.
- Kozich, V., de Franchis, R., and Kraus, J. P. (1993). Molecular defect in a patient with pyridoxine-responsive homocystinuria. *Hum Mol Genet* 2, 815-816.
- Lamesch, P., Li, N., Milstein, S., Fan, C., Hao, T., Szabo, G., Hu, Z., Venkatesan, K., Bethel, G., Martin, P., Rogers, J., Lawlor, S., McLaren, S., Dricot, A., Borick, H., Cusick, M. E., Vandenhaute, J., Dunham, I., Hill, D. E., and Vidal, M. (2007). hORFeome v3.1: a resource of human open reading frames representing over 10,000 human genes. *Genomics* 89, 307-315.
- Maclea, K. N., Gaustadnes, M., Oliveriusova, J., Janosik, M., Kraus, E., Kozich, V., Kery, V., Skovby, F., Rudiger, N., Ingerslev, J., Stabler, S. P., Allen, R. H., and Kraus, J. P. (2002). High homocysteine and thrombosis without connective tissue disorders are associated with a novel class of cystathionine  $\beta$ -synthase (CBS) mutations. *Hum Mutat* 19, 641-655.
- Mannherz, H. G., Ballweber, E., Galla, M., Villard, S., Granier, C., Steegborn, C., Schmidtman, A., Jaquet, K., Pope, B., and Weeds, A. G. (2007). Mapping the ADF/cofilin binding site on monomeric actin by competitive cross-linking and peptide array: evidence for a second binding site on monomeric actin. *J Mol Biol* 366, 745-755.
- Meier, M., Janosik, M., Kery, V., Kraus, J. P., and Burkhard, P. (2001). Structure of human cystathionine  $\beta$ -synthase: a unique pyridoxal 5'-phosphate-dependent heme protein. *EMBO J* 20, 3910-3916.
- Mudd, S. H., Skovby, F., Levy, H. L., Pettigrew, K. D., Wilcken, B., Pyeritz, R. E., Andria, G., Boers, G. H., Bromberg, I. L., Cerone, R., and et al. (1985). The natural history of homocystinuria due to cystathionine  $\beta$ -synthase deficiency. *Am J Hum Genet* 37, 1-31.
- Ortega, S., Malumbres, M., and Barbacid, M. (2002). Cyclin D-dependent kinases, INK4 inhibitors and cancer. *Biochim Biophys Acta* 1602, 73-87.
- Phornphutkul, C., Introne, W. J., Perry, M. B., Bernardini, I., Murphey, M. D., Fitzpatrick, D. L., Anderson, P. D., Huizing, M., Anikster, Y., Gerber, L. H., and Gahl, W. A. (2002). Natural history of alkaptonuria. *N Engl J Med* 347, 2111-2121.
- Rodriguez, J. M., Timm, D. E., Titus, G. P., Beltran-Valero De Bernabe, D., Criado, O., Mueller, H. A., Rodriguez De Cordoba, S., and Penalva, M. A. (2000). Structural and functional analysis of mutations in alkaptonuria. *Hum Mol Genet* 9, 2341-2350.
- Rual, J. F., Venkatesan, K., Hao, T., Hirozane-Kishikawa, T., Dricot, A., Li, N., Berriz, G. F., Gibbons, F. D., Dreze, M., Ayivi-Guedehoussou, N., Klitgord, N., Simon, C., Boxem, M., Milstein, S., Rosenberg, J., Goldberg, D. S., Zhang, L.

- V., Wong, S. L., Franklin, G., Li, S., *et al.* (2005). Towards a proteome-scale map of the human protein-protein interaction network. *Nature* 437, 1173-1178.
- Stergiopoulos, S. G., and Stratakis, C. A. (2003). Human tumors associated with Carney complex and germline *PRKAR1A* mutations: a protein kinase A disease! *FEBS Lett* 546, 59-64.
- Titus, G. P., Mueller, H. A., Burgner, J., Rodriguez De Cordoba, S., Penalva, M. A., and Timm, D. E. (2000). Crystal structure of human homogentisate dioxygenase. *Nat Struct Biol* 7, 542-546.
- Walhout, A. J., and Vidal, M. (2001). High-throughput yeast two-hybrid assays for large-scale protein interaction mapping. *Methods* 24, 297-306.

## SUPPLEMENTARY FIGURE LEGENDS

**Figure S1** Distribution of autosomal dominant and autosomal recessive diseases with respect to their associated “in-frame” mutations, excluding all human orthologs of essential genes in mouse, fly, worm and yeast. Mutations in each gene associated with each mode of inheritance are grouped as one trait. Each data point represents the percentage of either autosomal recessive (blue bar) or autosomal dominant (red bar) traits that have a fraction of “in-frame” mutations no less than the value on the X axis. Statistical significance of the observed difference between distributions is assessed by Mann-whitney U test ( $P < 4.0 \times 10^{-13}$ ). The number of traits, genes, diseases and total mutations in each bin are provided in Supplementary table 1.

**Figure S2** Profiling disease-causing allele-specific interaction defects of CBS (cystathione  $\beta$ -synthase). **(A)** Y2H analysis and immunoblotting detection of wild-type and mutant proteins of CBS. **(B)** Residues affected by mutations are shown on the reported CBS structure (Meier *et al.*, 2001), with relative solvent-accessible surface area (%ASA) indicated for surface exposed residues. **(C)** Vertical lines along a Pfam domain representation of CBS show positions of mutations. **(D)** Score of each Y2H interaction. Activation of at least two of the three reporter genes was taken as a positive interaction. Interaction pairs showing less than two positive reporters are scored as “-”. Interaction pairs showing the same number of positive reporters as the corresponding wild type are scored as “+”. Interactions that lose expression of one reporter but still show

expression of the other two reporters are scored as “R”. Biochemical activities for P422L (Maclean *et al.*, 2002) and I278T (Chen *et al.*, 2006) were obtained from the literature. The activity of CBS P145L was obtained from the CBS mutation database (<http://www.uchsc.edu/cbs/cbsdata/cbsmain.htm>).

**Figure S3** Profiling disease-causing allele-specific interaction defects of HGD (homogenistate dioxygenase). **(A)** Y2H analysis and immunoblotting detection of wild-type and mutant proteins of HGD. **(B)** Residues affected by mutations are shown on the reported HGD structure (Titus *et al.*, 2000), with relative solvent-accessible surface area (%ASA) indicated for surface exposed residues. **(C)** Vertical lines along a Pfam domain representation of HGD show positions of mutations. **(D)** Score of each Y2H interaction. Activation of at least two of the three reporter genes was taken as a positive interaction. Interaction pairs showing less than two positive reporters are scored as “-”. Interaction pairs showing the same number of positive reporters as the corresponding wild type are scored as “+”. Interactions that lose expression of one reporter but still show expression of the other two reporters are scored as “R”. Biochemical activities for H371R, V300G, R225H, and E42A were obtained from the literature (Rodriguez *et al.*, 2000).

**Figure S4** Profiling disease-causing allele-specific interaction defects of ACTG1 (cytoplasmic  $\gamma$ -actin). **(A)** Y2H analysis and immunoblotting detection of wild-type and mutant proteins of ACTG1. **(B)** Residues affected by mutations are shown

on the structure (Chik *et al.*, 1996), with relative solvent-accessible surface area (%ASA) indicated for surface exposed residues. (C) Vertical lines along a Pfam domain representation of ACTG1 show positions of mutations. (D) Score of each Y2H interaction. Activation of at least two of the three reporter genes was taken as a positive interaction. Interaction pairs showing less than two positive reporters are scored as “-”. Interaction pairs showing the same number of positive reporters as the corresponding wild type are scored as “+”. Interactions that lose expression of one reporter but still show expression of the other two reporters are scored as “R”.

**Figure S5** Profiling disease-causing allele-specific interaction defects of CDK4 (cyclin dependent kinase 4). (A) Y2H analysis and immunoblotting detection of wild-type and mutant proteins of CDK4. (B) Residues affected by mutations are shown on the structure of CDK4 (in grey) in complex with CCND3 (Day *et al.*, 2009) (in green) with relative solvent-accessible surface area (%ASA) shown. Location of the CDKN2C inhibitor was extrapolated from the structure (Jeffrey *et al.*, 2000) of CDK6 (not shown) in complex with CDKN2C (in light blue). Residues (D67 and D76) which make salt bridges with CDK4 (R24) are shown as sticks. (C) Vertical lines along a Pfam domain representation of CDK4 show positions of mutations. (D) Score of each Y2H interaction. Activation of at least two of the three reporter genes was taken as a positive interaction. Interaction pairs showing less than two positive reporters are scored as “-”. Interaction pairs showing the same number of positive reporters as the corresponding wild type

are scored as “+”. Interactions that lose expression of one reporter but still show expression of the other two reporters are scored as “R”.

**Figure S6** Profiling disease-causing allele-specific interaction defects of PRKAR1A (cAMP-dependent protein kinase type I $\alpha$  regulatory subunit). **(A)** Y2H analysis and immunoblotting detection of wild-type and mutant proteins of PRKAR1A. Proteins with expected sizes are labeled with green rectangles. **(B)** Vertical lines along a Pfam domain representation of PRKAR1A show positions of mutations. **(C)** Score of each Y2H interaction. Activation of at least two of the three reporter genes was taken as a positive interaction. Interaction pairs showing less than two positive reporters are scored as “-”. Interaction pairs showing the same number of positive reporters as the corresponding wild type are scored as “+”. Interactions that lose expression of one reporter but still show expression of the other two reporters are scored as “R”.

**Figure S7** Distribution of residues affected by disease-causing missense mutations with respect to their relative solvent-accessible surface area in X-ray protein structures. Error bars represent standard errors of the mean.

**Figure S8** Average fractions of “in-frame” mutations per gene associated with either autosomal dominant or autosomal recessive disease. The *P*-value of the observed difference, measured by Mann-Whitney U test, is shown.

**Figure S9** Phenotypes and interaction score of the five controls of Y2H assay (Walhout and Vidal, 2001) are show.



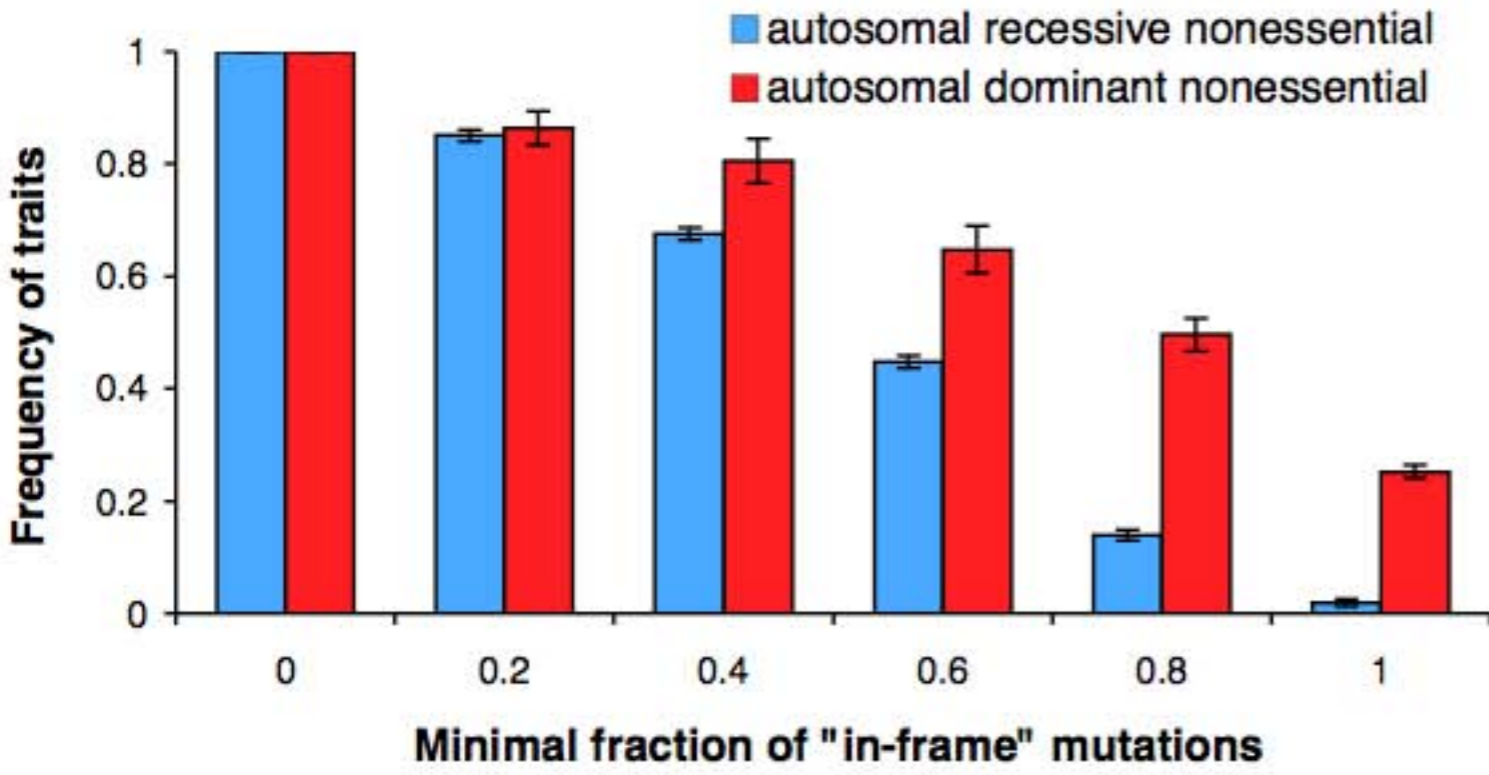

Figure S1

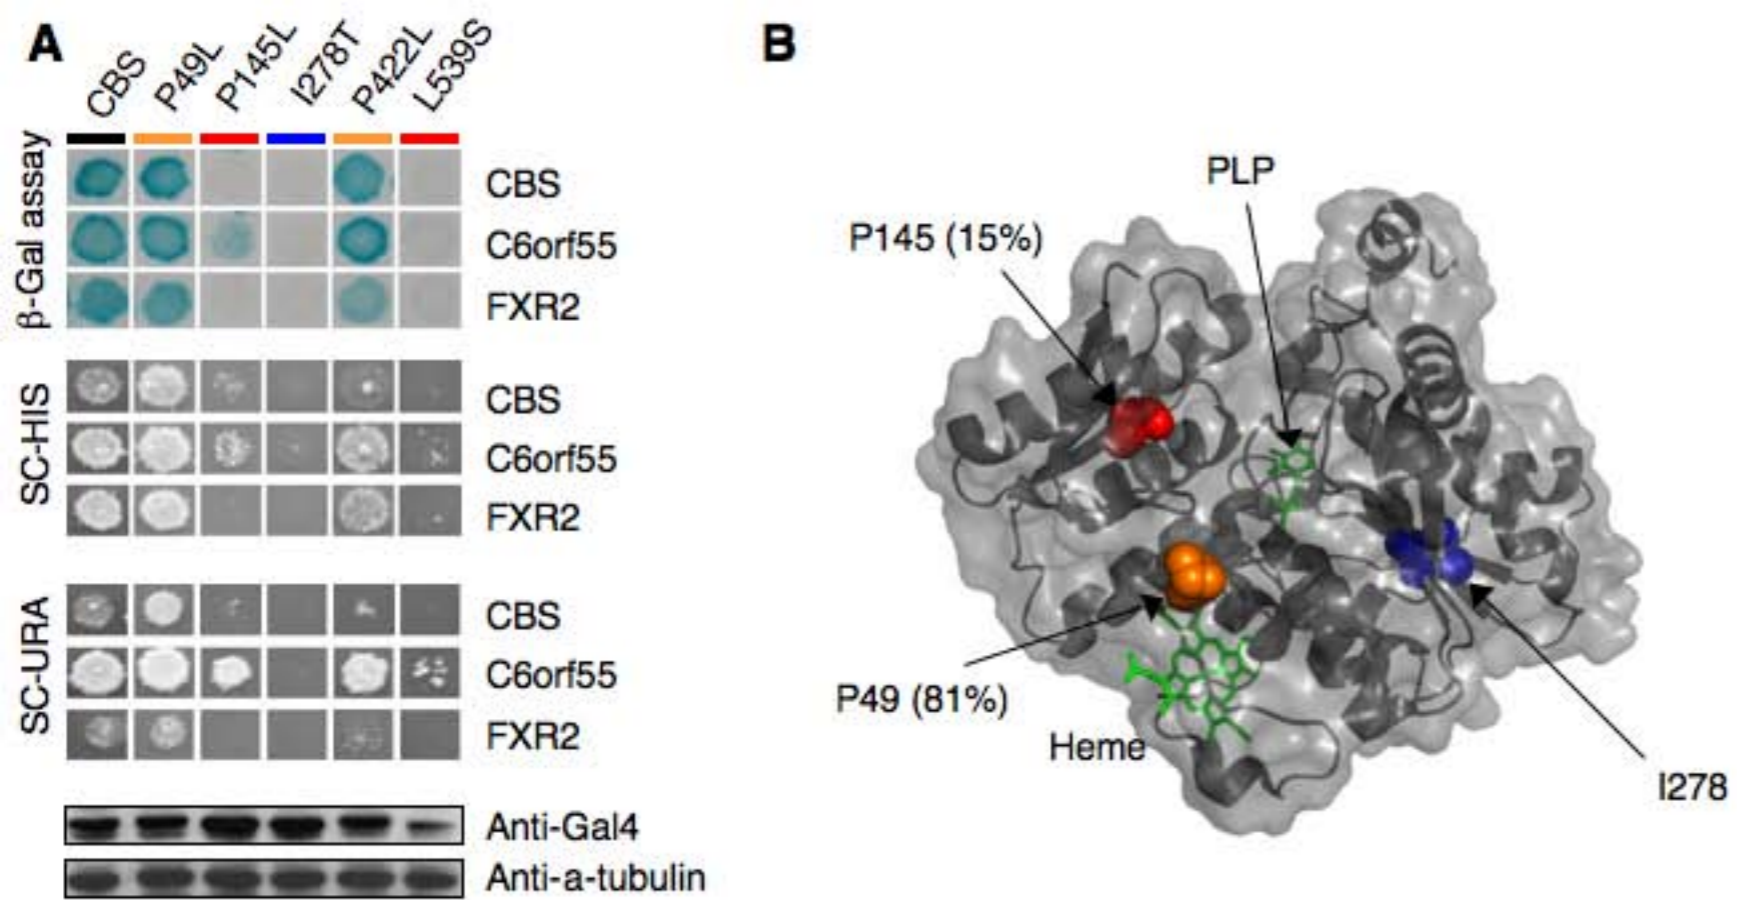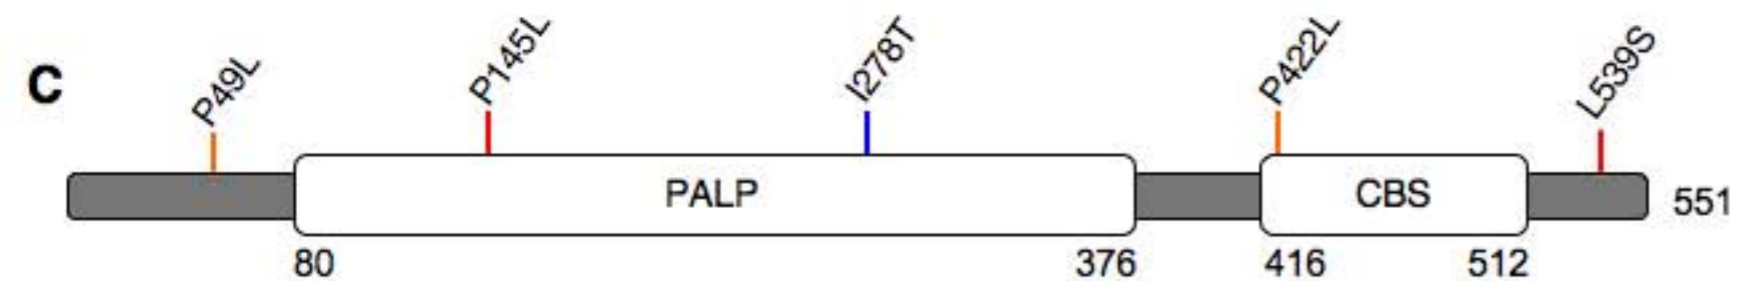

**D**

| Y2H Reporter      | CBS  | P49L | P145L | I278T | P422L | L539S | Interactors |
|-------------------|------|------|-------|-------|-------|-------|-------------|
| <i>lacZ</i>       | yes  | yes  | no    | no    | yes   | no    | CBS         |
|                   | yes  | yes  | yes   | no    | yes   | no    | C6orf55     |
|                   | yes  | yes  | no    | no    | yes   | no    | FXR2        |
| <i>HIS3</i>       | yes  | yes  | yes   | no    | yes   | no    | CBS         |
|                   | yes  | yes  | yes   | no    | yes   | yes   | C6orf55     |
|                   | yes  | yes  | no    | no    | yes   | yes   | FXR2        |
| <i>URA3</i>       | yes  | yes  | yes   | no    | yes   | no    | CBS         |
|                   | yes  | yes  | yes   | no    | yes   | yes   | C6orf55     |
|                   | yes  | yes  | no    | no    | yes   | no    | FXR2        |
| Interaction score | wt   | +    | R     | -     | +     | -     | CBS         |
|                   | wt   | +    | +     | -     | +     | R     | C6orf55     |
|                   | wt   | +    | -     | -     | +     | -     | FXR2        |
| Enzyme activity   | 100% | NA   | 0%    | 1~5%  | 100%  | NA    |             |

Figure S2

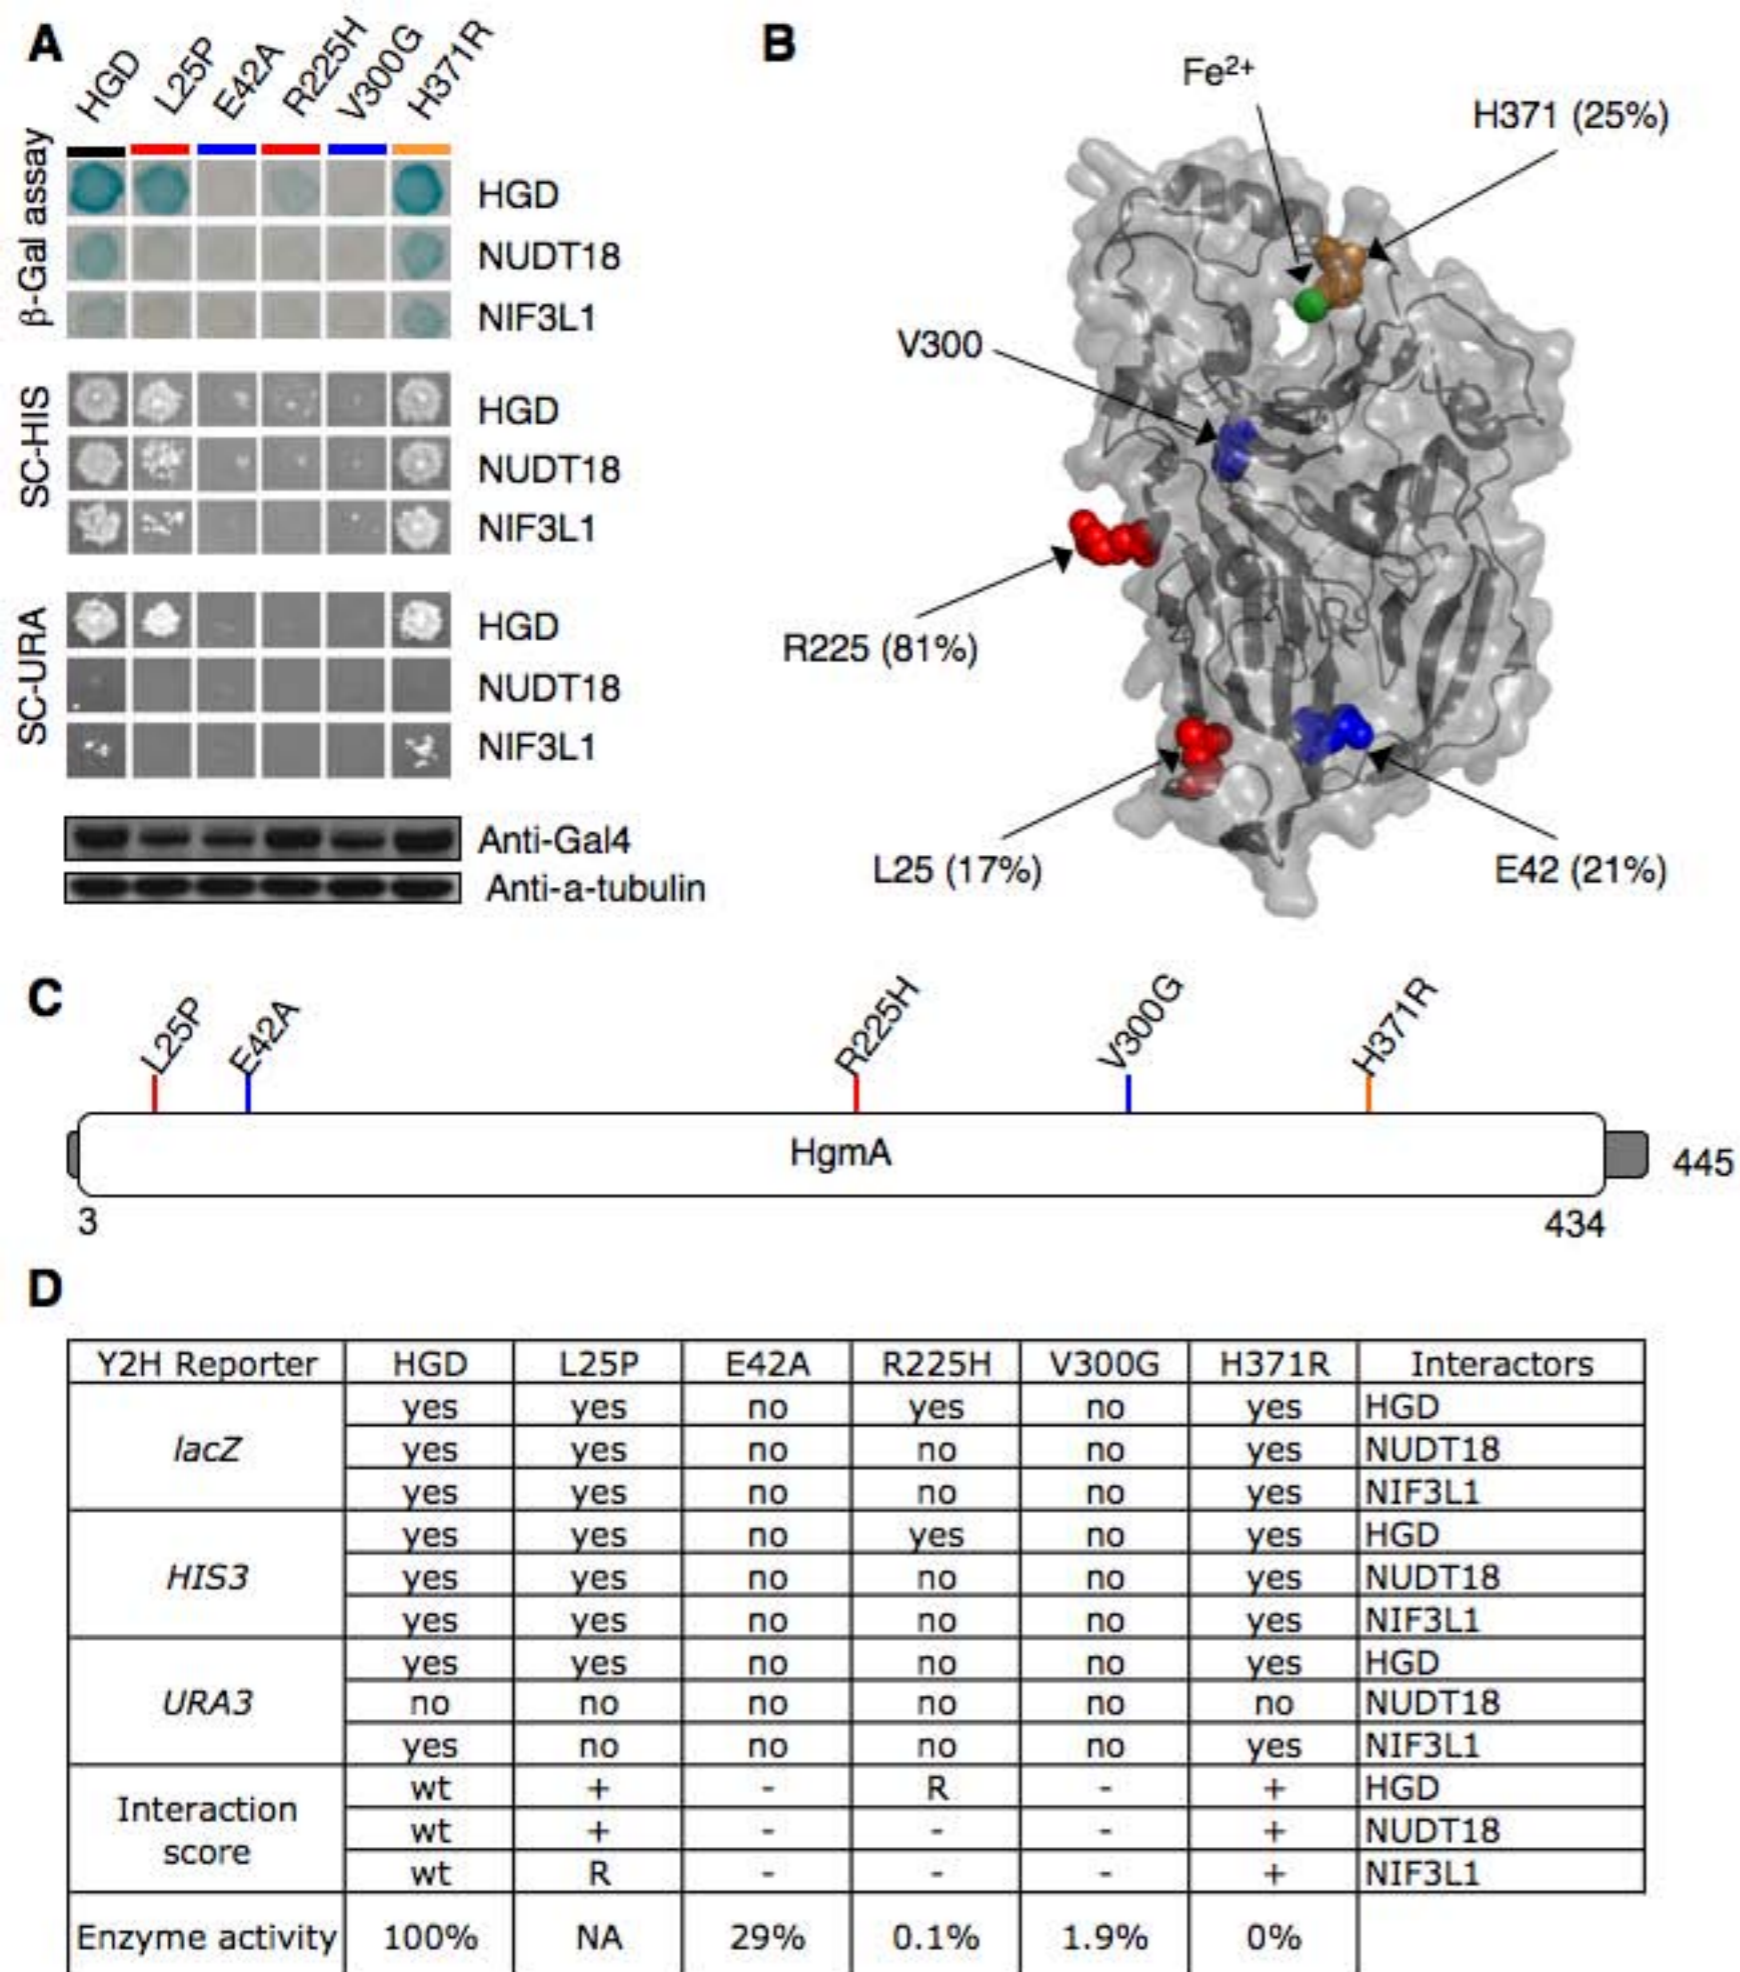

Figure S3

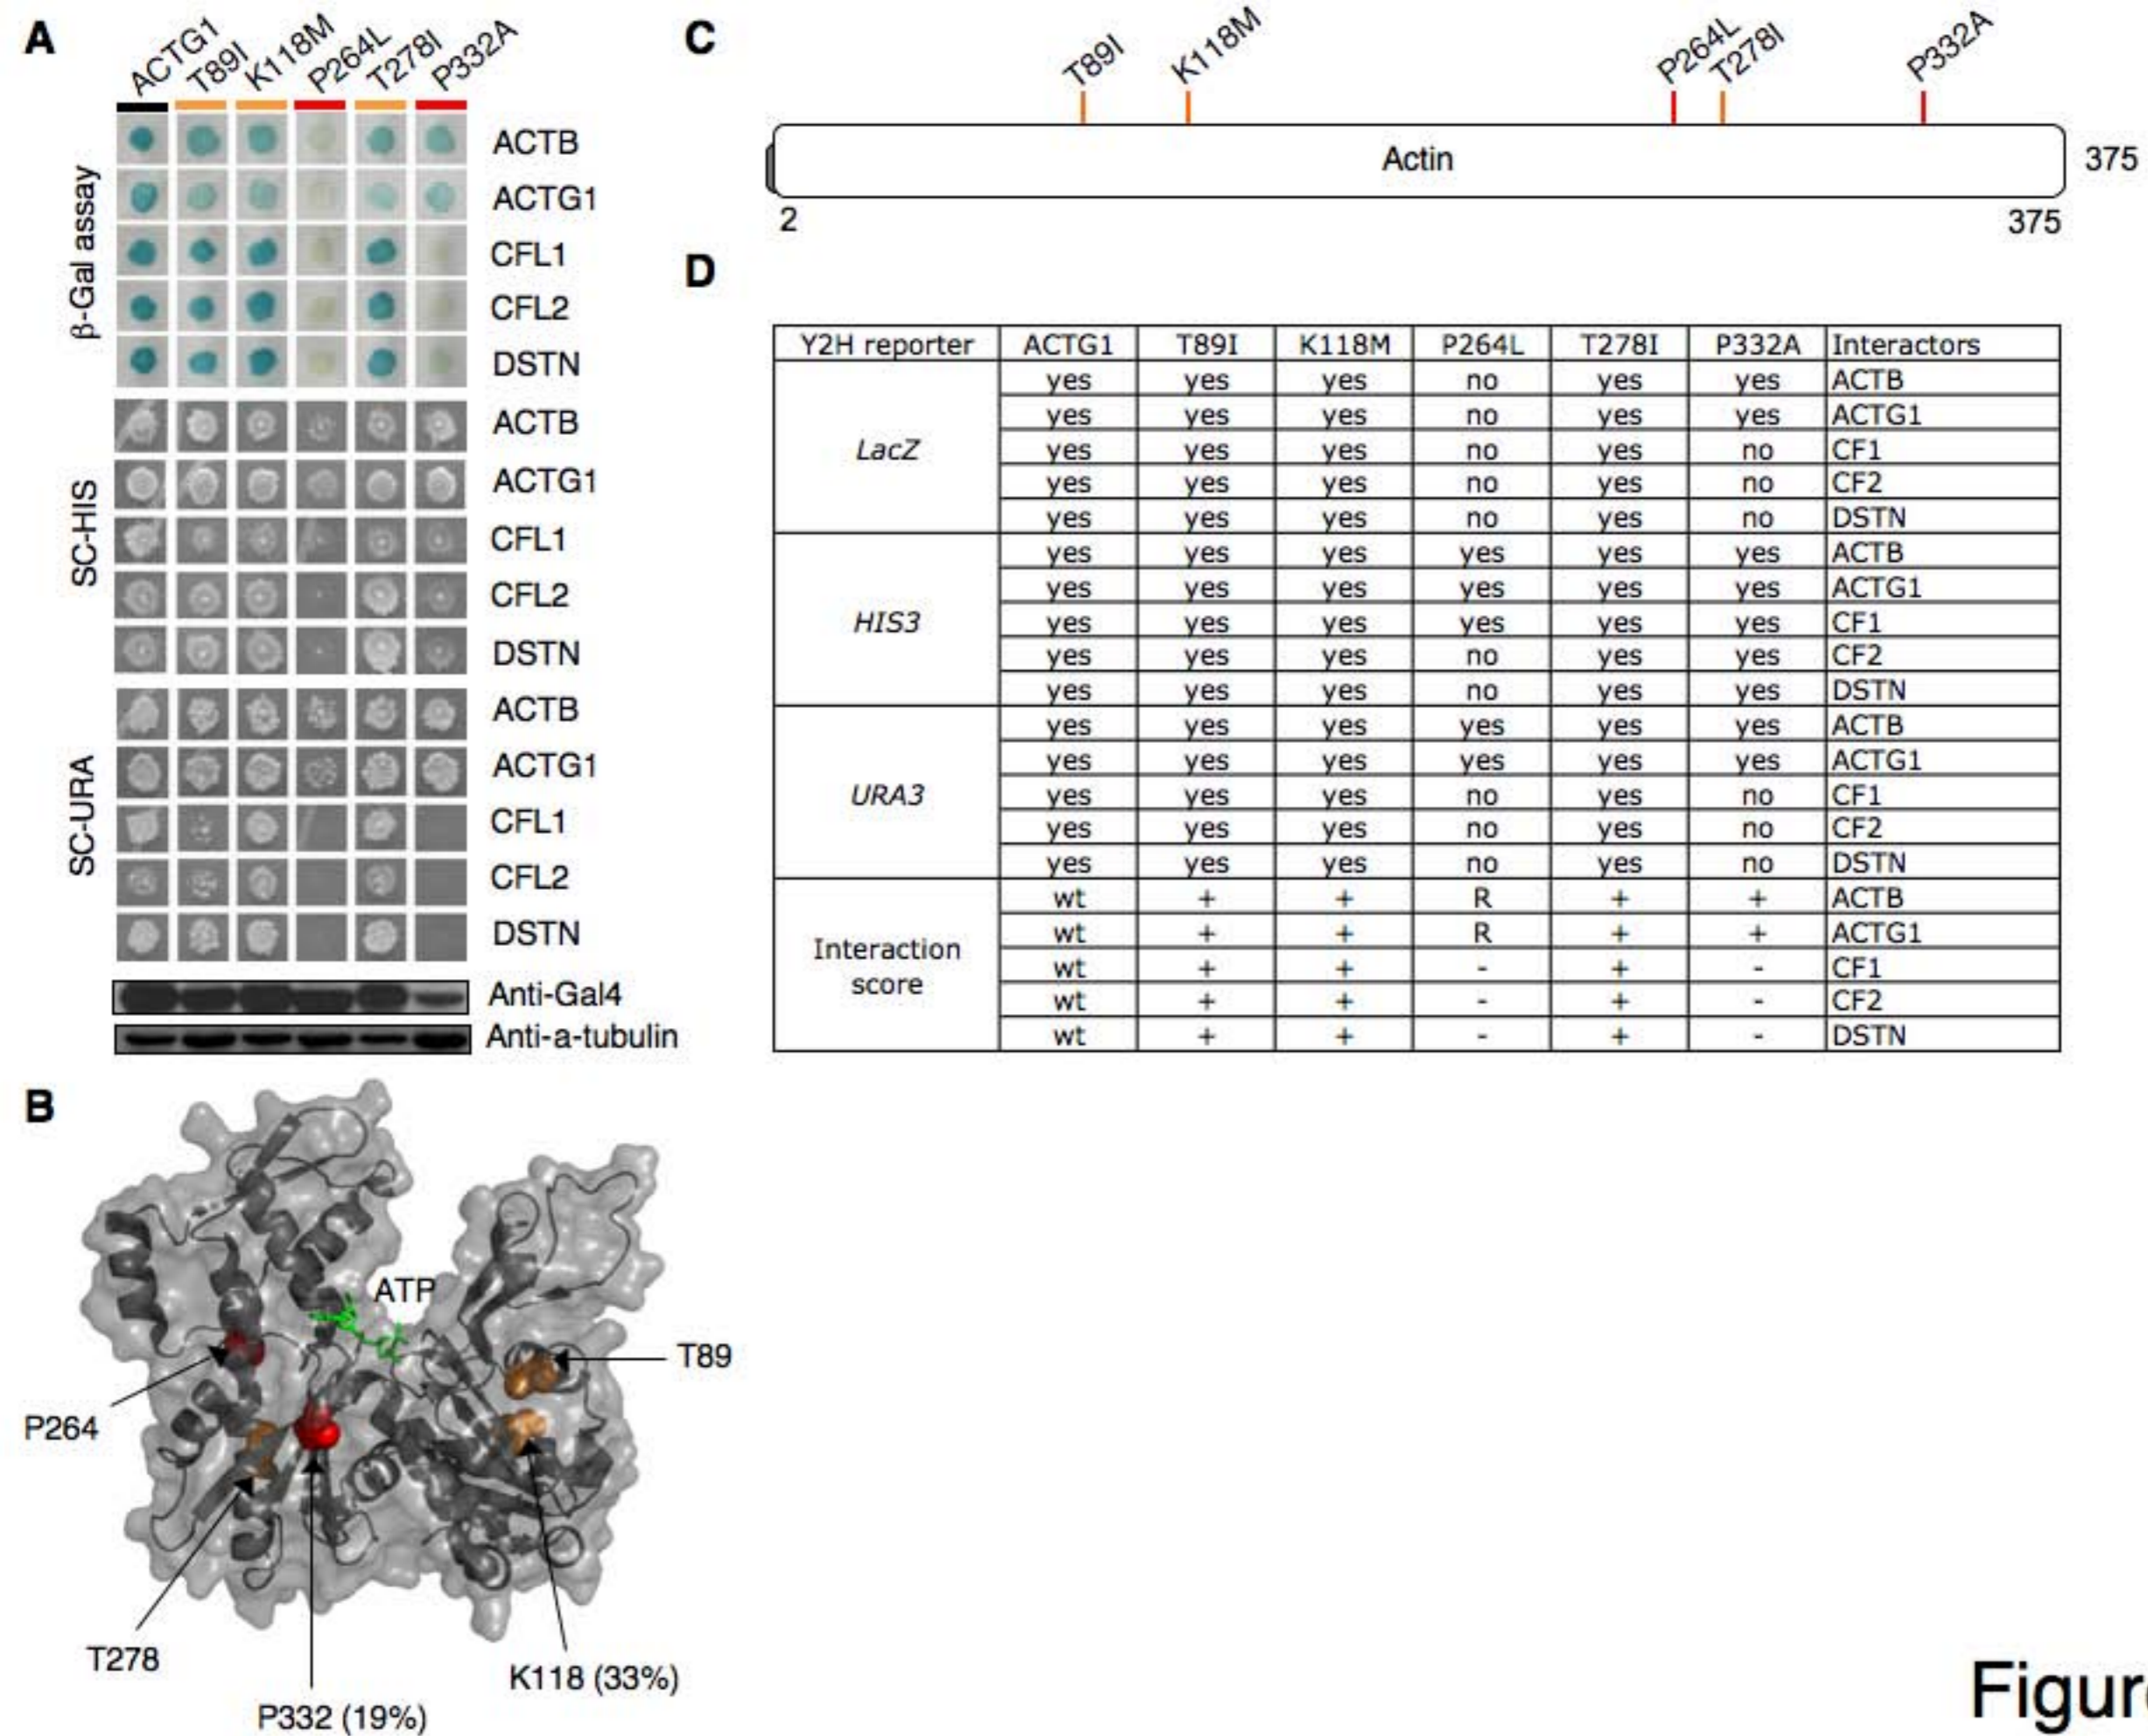

Figure S4

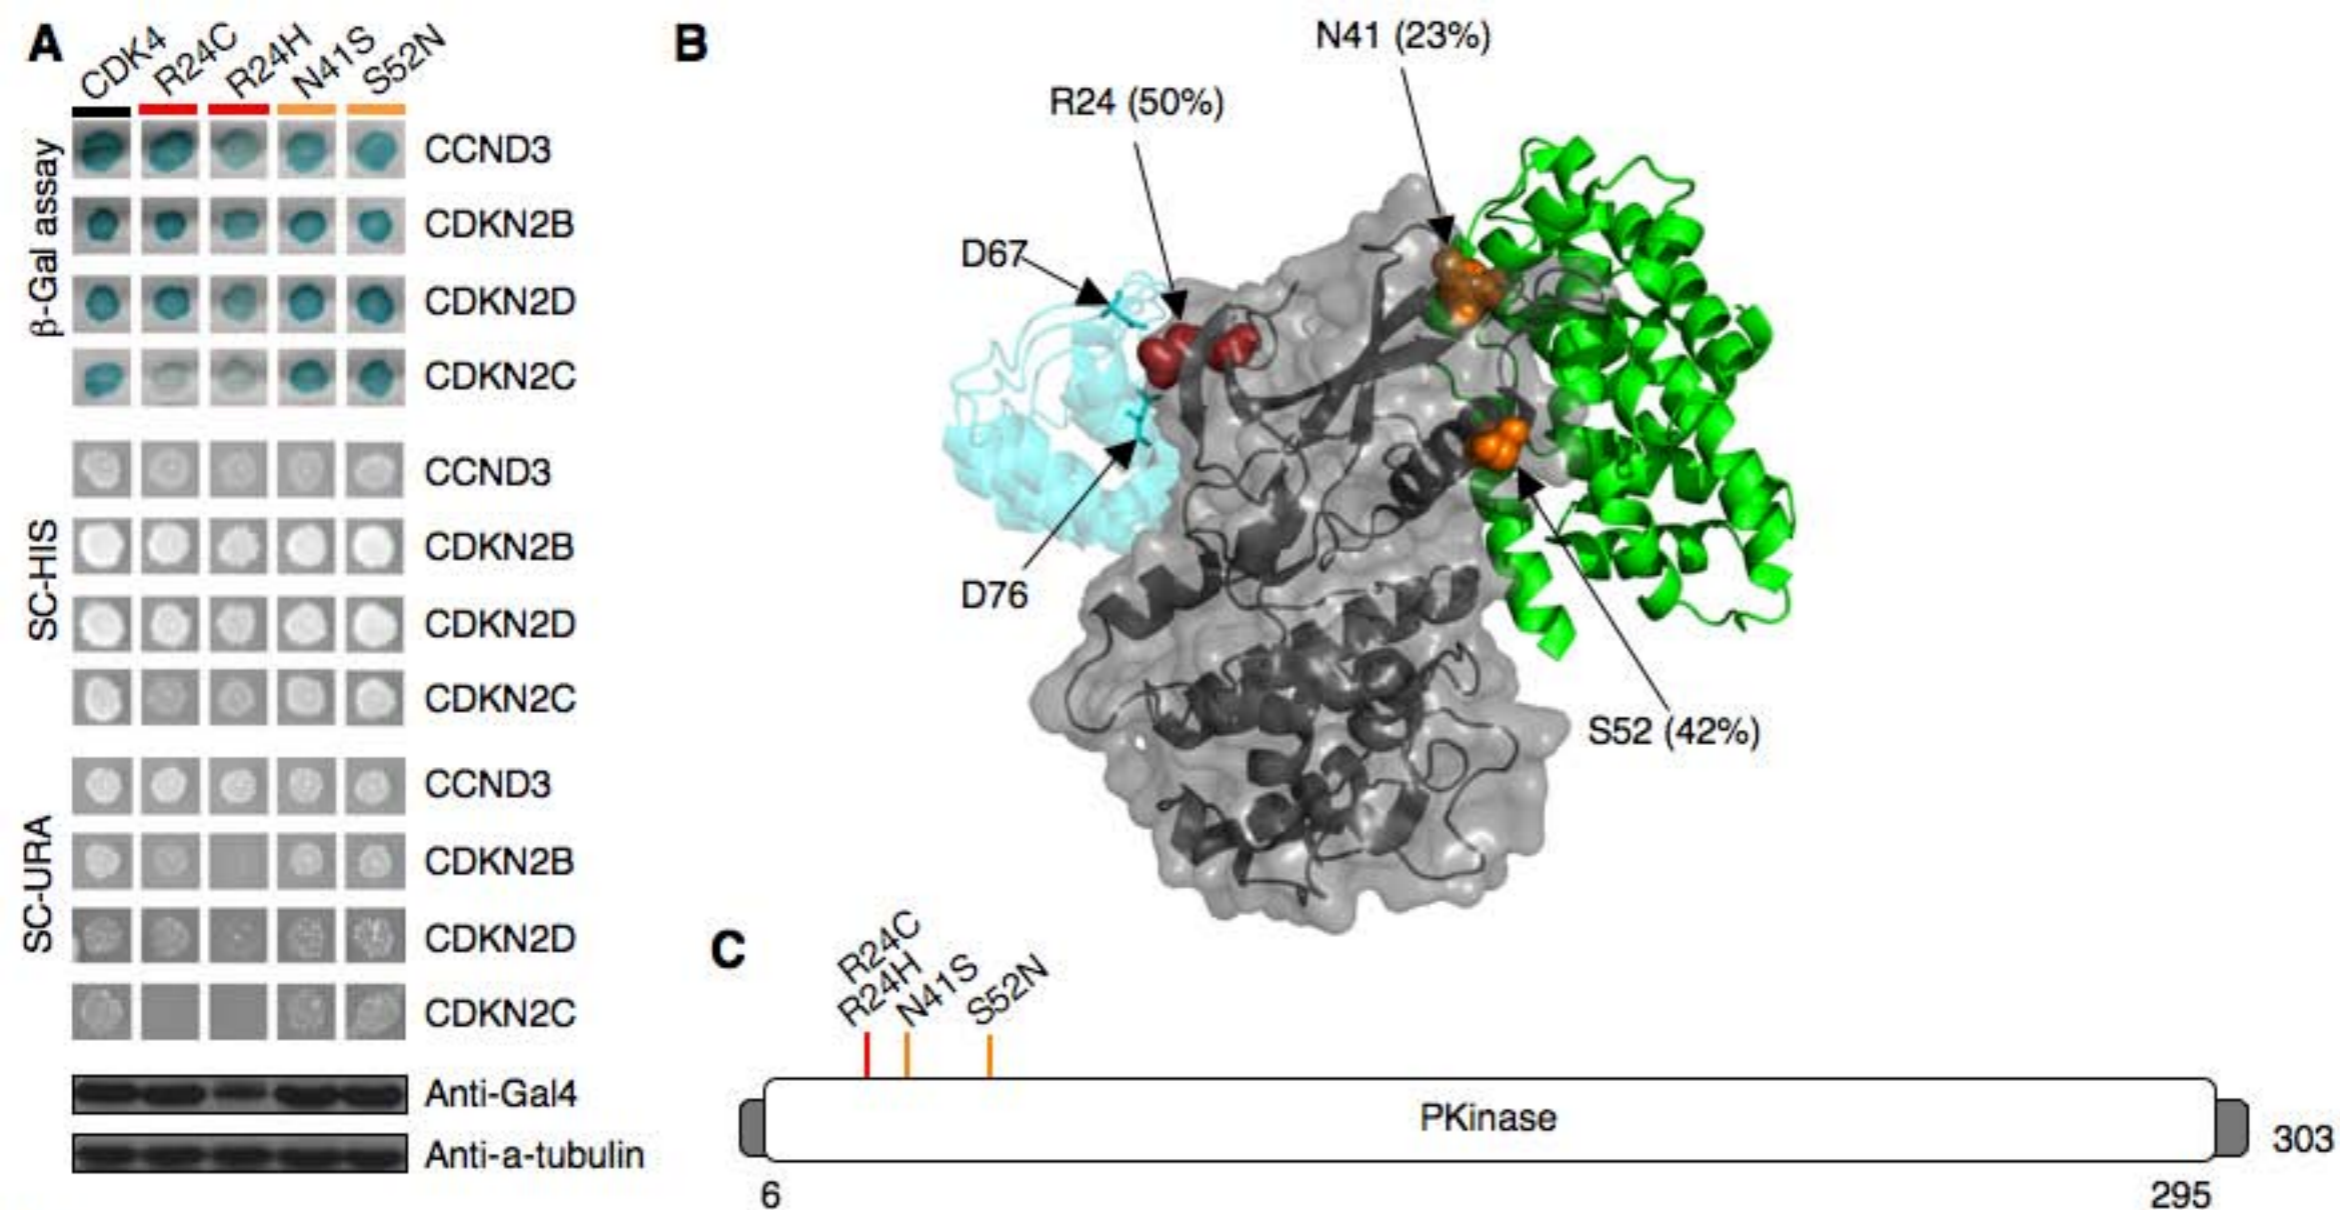

**D**

| Y2H reporter      | CDK4 | R24C | R24H | N41S | S52N | Interactors |
|-------------------|------|------|------|------|------|-------------|
| <i>LacZ</i>       | yes  | yes  | yes  | yes  | yes  | CCND3       |
|                   | yes  | yes  | yes  | yes  | yes  | CDKN2B      |
|                   | yes  | yes  | yes  | yes  | yes  | CDKN2D      |
|                   | yes  | yes  | yes  | yes  | yes  | CDKN2C      |
| <i>HIS3</i>       | yes  | yes  | yes  | yes  | yes  | CCND3       |
|                   | yes  | yes  | yes  | yes  | yes  | CDKN2B      |
|                   | yes  | yes  | yes  | yes  | yes  | CDKN2D      |
|                   | yes  | yes  | yes  | yes  | yes  | CDKN2C      |
| <i>URA3</i>       | yes  | yes  | yes  | yes  | yes  | CCND3       |
|                   | yes  | yes  | no   | yes  | yes  | CDKN2B      |
|                   | yes  | yes  | yes  | yes  | yes  | CDKN2D      |
|                   | yes  | no   | no   | yes  | yes  | CDKN2C      |
| Interaction score | wt   | +    | +    | +    | +    | CCND3       |
|                   | wt   | +    | R    | +    | +    | CDKN2B      |
|                   | wt   | +    | +    | +    | +    | CDKN2D      |
|                   | wt   | R    | R    | +    | +    | CDKN2C      |

Figure S5

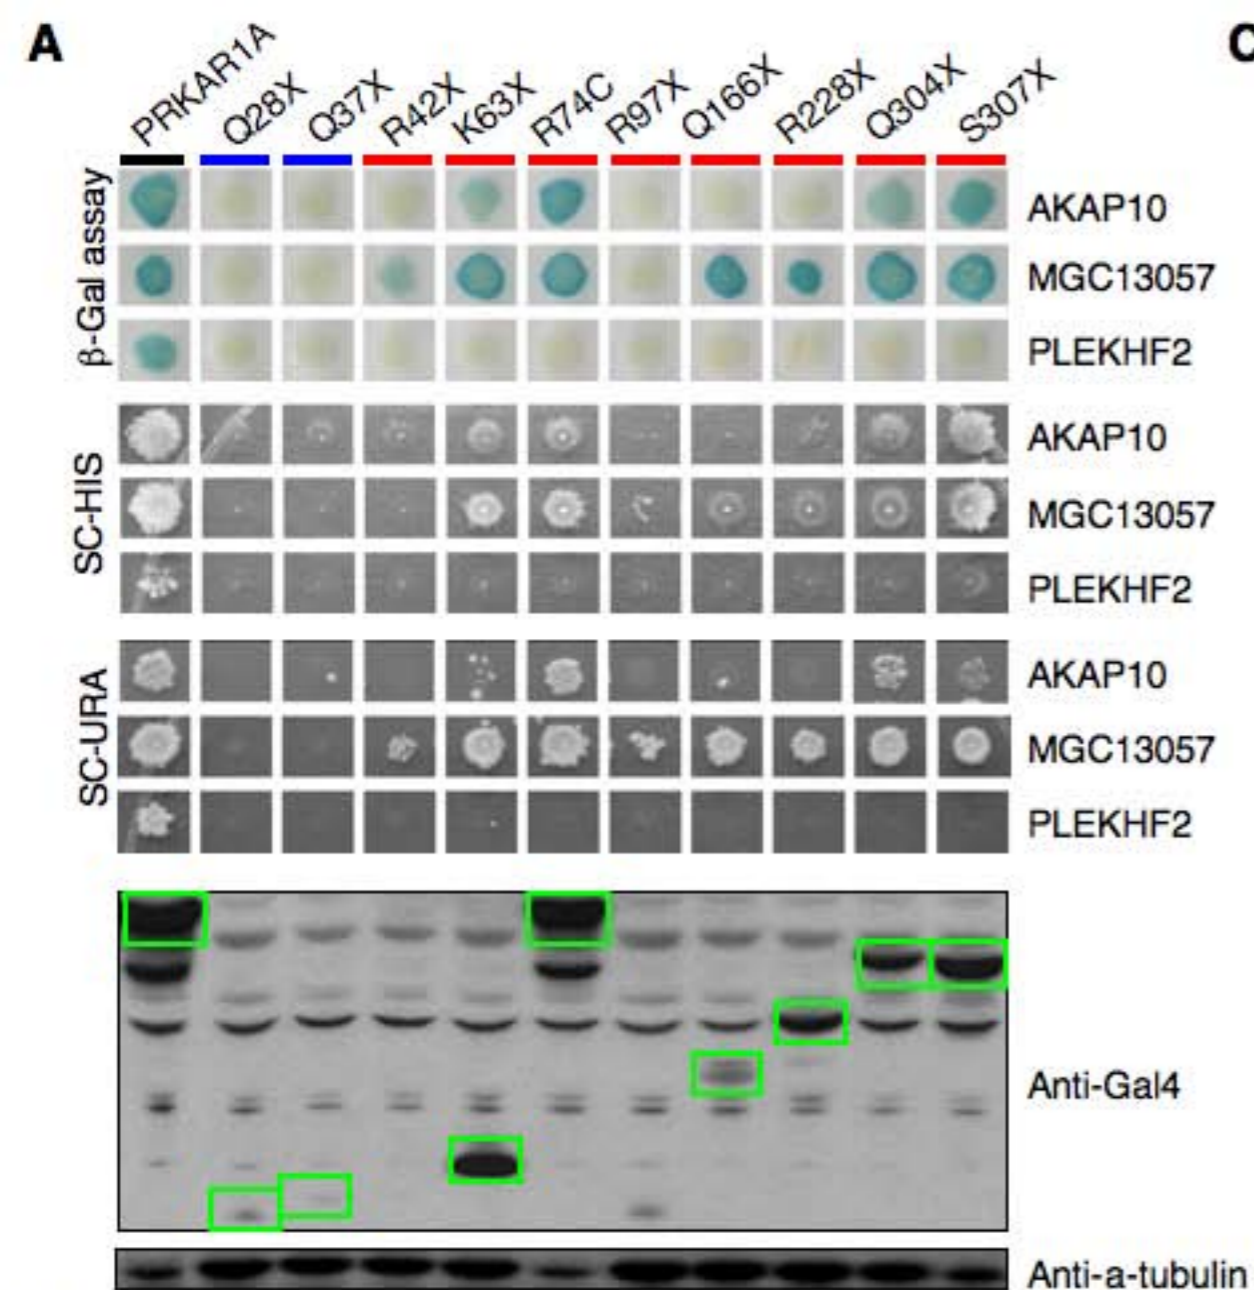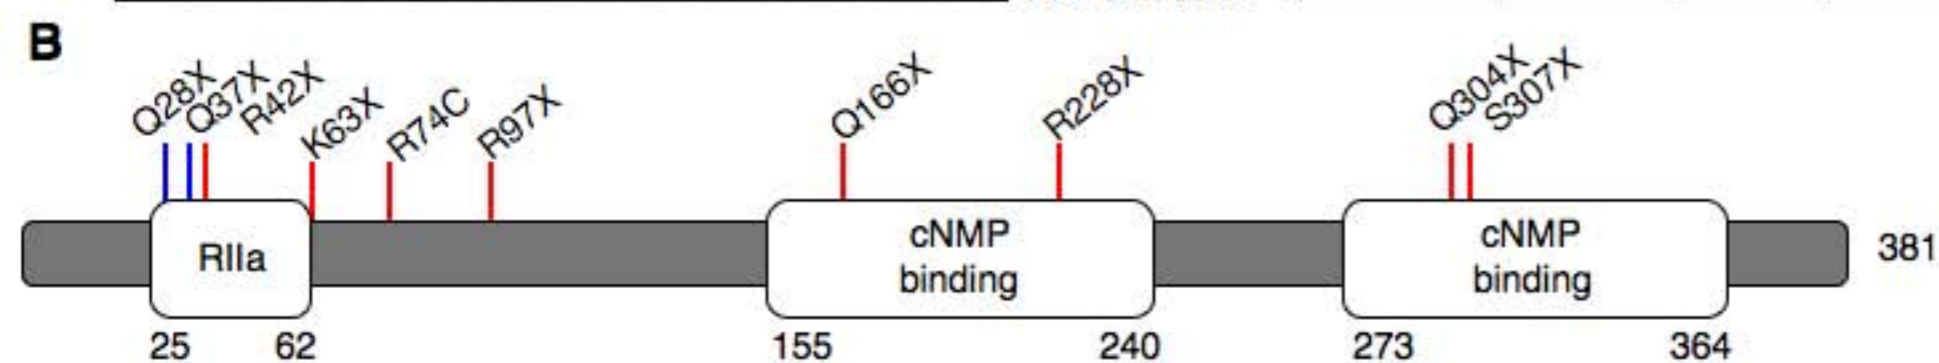

**C**

| Y2H reporter      | PRKAR1A | Q28X | Q37X | R42X | K63X | R74C | Interactors |
|-------------------|---------|------|------|------|------|------|-------------|
| <i>lacZ</i>       | yes     | no   | no   | no   | yes  | yes  | AKAP10      |
|                   | yes     | no   | no   | yes  | yes  | yes  | MGC13057    |
|                   | yes     | no   | no   | no   | no   | no   | PLEKHF2     |
| <i>HIS3</i>       | yes     | yes  | yes  | yes  | yes  | yes  | AKAP10      |
|                   | yes     | no   | no   | no   | yes  | yes  | MGC13057    |
|                   | yes     | no   | no   | no   | no   | no   | PLEKHF2     |
| <i>URA3</i>       | yes     | no   | no   | no   | yes  | yes  | AKAP10      |
|                   | yes     | no   | no   | yes  | yes  | yes  | MGC13057    |
|                   | yes     | no   | no   | no   | no   | no   | PLEKHF2     |
| Interaction score | wt      | -    | -    | -    | +    | +    | AKAP10      |
|                   | wt      | -    | -    | R    | +    | +    | MGC13057    |
|                   | wt      | -    | -    | -    | -    | -    | PLEKHF2     |

  

| Y2H reporter      | PRKAR1A | R97X | Q166X | R228X | Q304X | S307X | Interactors |
|-------------------|---------|------|-------|-------|-------|-------|-------------|
| <i>lacZ</i>       | yes     | no   | no    | no    | yes   | yes   | AKAP10      |
|                   | yes     | no   | yes   | yes   | yes   | yes   | MGC13057    |
|                   | yes     | no   | no    | no    | no    | no    | PLEKHF2     |
| <i>HIS3</i>       | yes     | no   | no    | yes   | yes   | yes   | AKAP10      |
|                   | yes     | yes  | yes   | yes   | yes   | yes   | MGC13057    |
|                   | yes     | no   | no    | no    | no    | no    | PLEKHF2     |
| <i>URA3</i>       | yes     | no   | no    | no    | yes   | yes   | AKAP10      |
|                   | yes     | yes  | yes   | yes   | yes   | yes   | MGC13057    |
|                   | yes     | no   | no    | no    | no    | no    | PLEKHF2     |
| Interaction score | wt      | -    | -     | -     | +     | +     | AKAP10      |
|                   | wt      | R    | +     | +     | +     | +     | MGC13057    |
|                   | wt      | -    | -     | -     | -     | -     | PLEKHF2     |

Figure S6

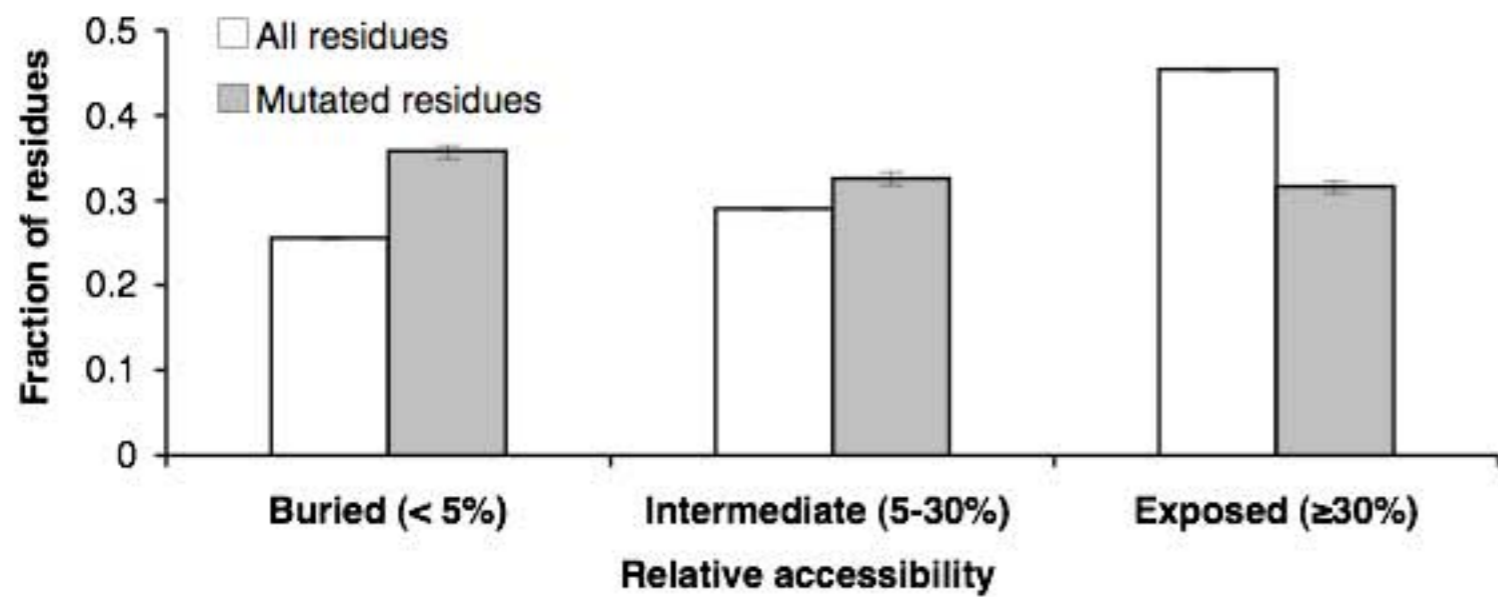

Fig. S7

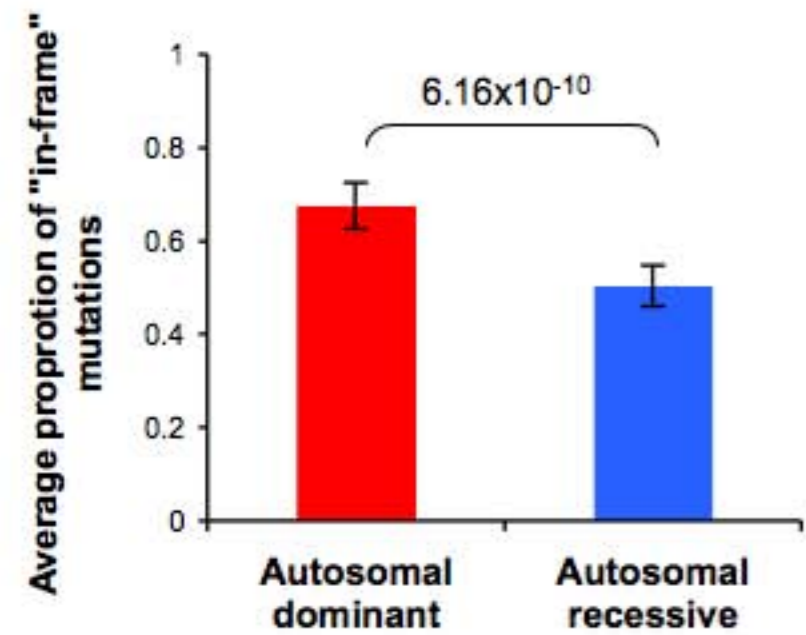

Fig. S8



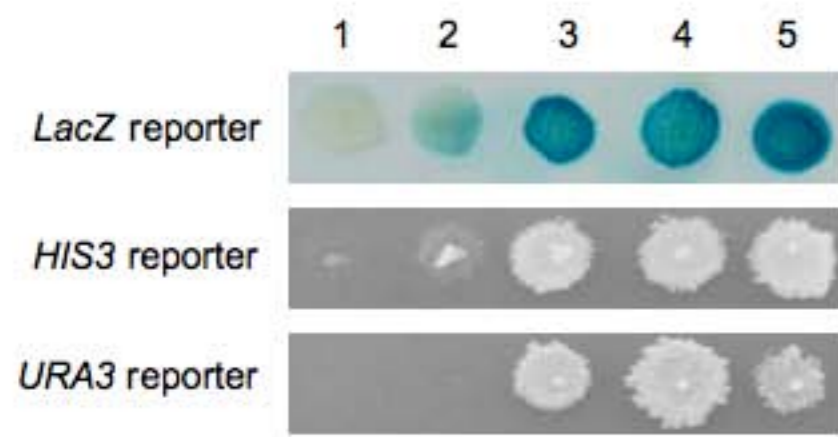

| Y2H reporter      | Control 1 | Control 2 | Control 3 | Control 4 | Control 5 |
|-------------------|-----------|-----------|-----------|-----------|-----------|
| <i>lacZ</i>       | no        | yes       | yes       | yes       | yes       |
| <i>HIS3</i>       | no        | yes       | yes       | yes       | yes       |
| <i>URA3</i>       | no        | no        | yes       | yes       | yes       |
| Interaction score | -         | +         | +         | +         | +         |

Fig. S9

**Supplemental table 1.** The number of traits, genes, diseases and total mutations in each bin in Figure 2C and Figure S1 for the analysis of "in-frame" versus "truncating" mutations

| Minimal fraction of "in-frame mutations in each bin |                                   | 0               | 0.2   | 0.4   | 0.6   | 0.8  | 1    |      |
|-----------------------------------------------------|-----------------------------------|-----------------|-------|-------|-------|------|------|------|
| Figure 2C                                           | Autosomal dominant                | Traits          | 411   | 357   | 305   | 240  | 177  | 95   |
|                                                     |                                   | Genes           | 329   | 288   | 249   | 198  | 151  | 83   |
|                                                     |                                   | Diseases        | 363   | 315   | 268   | 213  | 164  | 90   |
|                                                     |                                   | Total mutations | 17085 | 13470 | 9258  | 5738 | 3500 | 1153 |
|                                                     | Autosomal recessive               | Traits          | 515   | 443   | 355   | 240  | 76   | 12   |
|                                                     |                                   | Genes           | 482   | 414   | 335   | 230  | 74   | 12   |
|                                                     |                                   | Diseases        | 469   | 404   | 330   | 227  | 72   | 12   |
|                                                     |                                   | Total mutations | 16539 | 14967 | 13120 | 8531 | 1525 | 101  |
| Figure S1                                           | Autosomal dominant non-essential  | Traits          | 242   | 211   | 191   | 157  | 116  | 65   |
|                                                     |                                   | Genes           | 203   | 177   | 162   | 135  | 103  | 60   |
|                                                     |                                   | Diseases        | 226   | 197   | 177   | 149  | 115  | 65   |
|                                                     |                                   | Total mutations | 7587  | 7167  | 5871  | 3770 | 2371 | 812  |
|                                                     | Autosomal recessive non-essential | Traits          | 421   | 362   | 290   | 200  | 65   | 10   |
|                                                     |                                   | Genes           | 398   | 341   | 277   | 194  | 64   | 10   |
|                                                     |                                   | Diseases        | 388   | 333   | 271   | 191  | 62   | 10   |
|                                                     |                                   | Total mutations | 12356 | 11101 | 9616  | 7107 | 1318 | 89   |

**Supplemental table 2.** Different mutation spectrums of different diseases associated with the same gene

| Disease gene   | Disease 1 |                                            | Disease 2 |                                                        | Proportion of in-frame mutations |           | P value                |
|----------------|-----------|--------------------------------------------|-----------|--------------------------------------------------------|----------------------------------|-----------|------------------------|
|                | OMIM ID   | OMIM disease                               | OMIM ID   | OMIM disease                                           | Disease 1                        | Disease 2 |                        |
| <i>ABCA12</i>  | 242500    | ICHTHYOSIS CONGENITA, HARLEQUIN FETUS TYPE | 601277    | LAMELLAR ICHTHYOSIS 2                                  | 0.17                             | 1.00      | 3.39X10 <sup>-3</sup>  |
| <i>ABCA4</i>   | 601718    | RETINITIS PIGMENTOSA 19                    | 153800    | AGE-RELATED MACULAR DEGENERATION 2                     | 0.14                             | 0.79      | 3.64X10 <sup>-3</sup>  |
| <i>ABCA4</i>   | 601718    | RETINITIS PIGMENTOSA 19                    | 248200    | STARGARDT DISEASE 1                                    | 0.14                             | 0.63      | 1.28X10 <sup>-2</sup>  |
| <i>APOA1</i>   | 604091    | PRIMARY HYPOALPHALIPOPROTEINEMIA           | 105200    | FAMILIAL VISCERAL AMYLOIDOSIS                          | 0.42                             | 1.00      | 4.45X10 <sup>-3</sup>  |
| <i>APOB</i>    | 107730    | FAMILIAL HYPOBETALIPOPROTEINEMIA 1         | 144010    | HYPERCHOLESTEROLEMIA, AUTOSOMAL DOMINANT TYPE B        | 0.21                             | 1.00      | 2.50X10 <sup>-5</sup>  |
| <i>ARX</i>     | 300215    | LISSENCEPHALY WITH AMBIGUOUS GENITALIA     | 300419    | MENTAL RETARDATION, X-LINKED 54                        | 0.44                             | 1.00      | 1.89X10 <sup>-2</sup>  |
| <i>ATM</i>     | 208900    | ATAXIA-TELANGIECTASIA                      | 114480    | BREAST CANCER                                          | 0.19                             | 0.76      | 3.94X10 <sup>-9</sup>  |
| <i>BRCA1</i>   | 113705    | BREAST-OVARIAN CANCER                      | 176807    | PROSTATE CANCER                                        | 0.31                             | 1.00      | 2.96X10 <sup>-3</sup>  |
| <i>BRCA1</i>   | 114480    | BREAST CANCER                              | 176807    | PROSTATE CANCER                                        | 0.21                             | 1.00      | 4.44X10 <sup>-4</sup>  |
| <i>BRCA1</i>   | 114480    | BREAST CANCER                              | 113705    | BREAST-OVARIAN CANCER                                  | 0.21                             | 0.31      | 3.12X10 <sup>-3</sup>  |
| <i>BRCA2</i>   | 114480    | BREAST CANCER                              | 260350    | PANCREATIC CARCINOMA                                   | 0.21                             | 0.70      | 1.54X10 <sup>-3</sup>  |
| <i>BRCA2</i>   | 176807    | PROSTATE CANCER                            | 260350    | PANCREATIC CARCINOMA                                   | 0.00                             | 0.70      | 2.56X10 <sup>-2</sup>  |
| <i>BRCA2</i>   | 600185    | BREAST CANCER, TYPE 2                      | 114480    | BREAST CANCER                                          | 0.11                             | 0.21      | 4.62X10 <sup>-3</sup>  |
| <i>BRCA2</i>   | 600185    | BREAST CANCER, TYPE 2                      | 260350    | PANCREATIC CARCINOMA                                   | 0.11                             | 0.70      | 4.30X10 <sup>-5</sup>  |
| <i>BRCA2</i>   | 604370    | EPITHELIAL OVARIAN CANCER                  | 260350    | PANCREATIC CARCINOMA                                   | 0.07                             | 0.70      | 3.48X10 <sup>-4</sup>  |
| <i>BRCA2</i>   | 605724    | FANCONI ANEMIA, COMPLEMENTATION GROUP D1   | 260350    | PANCREATIC CARCINOMA                                   | 0.27                             | 0.70      | 4.86X10 <sup>-2</sup>  |
| <i>CACNA1A</i> | 108500    | EPISODIC ATAXIA, TYPE 2                    | 141500    | FAMILIAL HEMIPLEGIC MIGRAINE 1                         | 0.34                             | 0.91      | 1.33X10 <sup>-3</sup>  |
| <i>CDH1</i>    | 137215    | GASTRIC CANCER                             | 176807    | PROSTATE CANCER                                        | 0.30                             | 0.80      | 4.11X10 <sup>-2</sup>  |
| <i>CDH23</i>   | 601067    | USHER SYNDROME, TYPE ID                    | 601386    | DEAFNESS, AUTOSOMAL RECESSIVE 12                       | 0.32                             | 1.00      | 1.91X10 <sup>-7</sup>  |
| <i>CFTR</i>    | 219700    | CYSTIC FIBROSIS                            | 277180    | CONGENITAL BILATERAL APLASIA OF VAS DEFERENS           | 0.49                             | 0.83      | 2.59X10 <sup>-9</sup>  |
| <i>CFTR</i>    | 219700    | CYSTIC FIBROSIS                            | 167800    | PANCREATITIS, HEREDITARY                               | 0.49                             | 1.00      | 2.96X10 <sup>-2</sup>  |
| <i>COL1A1</i>  | 166200    | OSTEOGENESIS IMPERFECTA, TYPE I            | 166210    | OSTEOGENESIS IMPERFECTA, TYPE IIA                      | 0.19                             | 0.93      | 2.80X10 <sup>-21</sup> |
| <i>COL1A1</i>  | 166200    | OSTEOGENESIS IMPERFECTA, TYPE I            | 166220    | OSTEOGENESIS IMPERFECTA, TYPE IV                       | 0.19                             | 0.75      | 2.92X10 <sup>-6</sup>  |
| <i>COL1A1</i>  | 166200    | OSTEOGENESIS IMPERFECTA, TYPE I            | 259420    | OSTEOGENESIS IMPERFECTA, TYPE III                      | 0.19                             | 0.83      | 8.15X10 <sup>-9</sup>  |
| <i>COL1A1</i>  | 166200    | OSTEOGENESIS IMPERFECTA, TYPE I            | 120150    | OI/EDS COMBINED SYNDROME                               | 0.19                             | 0.82      | 8.41X10 <sup>-7</sup>  |
| <i>COL1A1</i>  | 166220    | OSTEOGENESIS IMPERFECTA, TYPE IV           | 166210    | OSTEOGENESIS IMPERFECTA, TYPE IIA                      | 0.75                             | 0.93      | 3.69X10 <sup>-2</sup>  |
| <i>COL1A2</i>  | 130060    | EHLERS-DANLOS SYNDROME, TYPE VII           | 166200    | OSTEOGENESIS IMPERFECTA, TYPE I                        | 0.08                             | 0.80      | 1.66X10 <sup>-4</sup>  |
| <i>COL1A2</i>  | 130060    | EHLERS-DANLOS SYNDROME, TYPE VII           | 166210    | OSTEOGENESIS IMPERFECTA, TYPE IIA                      | 0.08                             | 0.87      | 4.18X10 <sup>-6</sup>  |
| <i>COL1A2</i>  | 130060    | EHLERS-DANLOS SYNDROME, TYPE VII           | 166220    | OSTEOGENESIS IMPERFECTA, TYPE IV                       | 0.08                             | 0.81      | 6.98X10 <sup>-6</sup>  |
| <i>COL1A2</i>  | 130060    | EHLERS-DANLOS SYNDROME, TYPE VII           | 259420    | OSTEOGENESIS IMPERFECTA, TYPE III                      | 0.08                             | 0.95      | 7.14X10 <sup>-7</sup>  |
| <i>COL2A1</i>  | 108300    | STICKLER SYNDROME, TYPE I                  | 151210    | PLATYSPODYLIC LETHAL SKELETAL DYSPLASIA, TORRANCE TYPE | 0.10                             | 0.56      | 4.96X10 <sup>-3</sup>  |
| <i>COL2A1</i>  | 108300    | STICKLER SYNDROME, TYPE I                  | 184250    | SPONDYLOEPIMETAPHYSEAL DYSPLASIA, STRUDWICK TYPE       | 0.10                             | 1.00      | 8.21X10 <sup>-5</sup>  |

|        |        |                                                                 |        |                                                                 |      |      |                        |
|--------|--------|-----------------------------------------------------------------|--------|-----------------------------------------------------------------|------|------|------------------------|
| COL2A1 | 108300 | STICKLER SYNDROME, TYPE I                                       | 200610 | ACHONDROGENESIS, TYPE II                                        | 0.10 | 1.00 | 1.15X10 <sup>-12</sup> |
| COL2A1 | 151210 | PLATYSPODYLIC LETHAL SKELETAL DYSPLASIA, TORRANCE TYPE          | 200610 | ACHONDROGENESIS, TYPE II                                        | 0.56 | 1.00 | 5.31X10 <sup>-3</sup>  |
| COL2A1 | 156550 | KNIEST DYSPLASIA                                                | 184250 | SPONDYLOEPIMETAPHYSEAL DYSPLASIA, STRUDWICK TYPE                | 0.33 | 1.00 | 2.94X10 <sup>-2</sup>  |
| COL2A1 | 156550 | KNIEST DYSPLASIA                                                | 200610 | ACHONDROGENESIS, TYPE II                                        | 0.33 | 1.00 | 4.71X10 <sup>-5</sup>  |
| COL6A3 | 254090 | ULLRICH CONGENITAL MUSCULAR DYSTROPHY                           | 158810 | BETHLEM MYOPATHY                                                | 0.38 | 0.91 | 4.08X10 <sup>-2</sup>  |
| DMD    | 300376 | MUSCULAR DYSTROPHY, BECKER TYPE                                 | 302045 | DILATED CARDIOMYOPATHY, 3B                                      | 0.13 | 0.50 | 3.31X10 <sup>-2</sup>  |
| DMD    | 310200 | MUSCULAR DYSTROPHY, DUCHENNE TYPE                               | 300376 | MUSCULAR DYSTROPHY, BECKER TYPE                                 | 0.04 | 0.13 | 3.89X10 <sup>-2</sup>  |
| DMD    | 310200 | MUSCULAR DYSTROPHY, DUCHENNE TYPE                               | 302045 | DILATED CARDIOMYOPATHY, 3B                                      | 0.04 | 0.50 | 3.50X10 <sup>-4</sup>  |
| F5     | 227400 | FACTOR V DEFICIENCY                                             | 188055 | THROMBOPHILIA DUE TO DEFICIENCY OF ACTIVATED PROTEIN C COFACTOR | 0.30 | 0.86 | 7.93X10 <sup>-3</sup>  |
| FGFR2  | 101600 | PFEIFFER SYNDROME                                               | 123500 | CROUZON SYNDROME                                                | 0.62 | 0.94 | 2.45X10 <sup>-3</sup>  |
| FGG    | 202400 | CONGENITAL AFIBRINOGENEMIA                                      | 134820 | DYSFIBRINOGENEMIA CAUSING RECURRENT THROMBOSIS                  | 0.62 | 0.96 | 6.74X10 <sup>-3</sup>  |
| FLNA   | 300049 | PERIVENTRICULAR HETEROTOPIA                                     | 304120 | OTOPALATODIGITAL SYNDROME, TYPE II                              | 0.29 | 1.00 | 1.31X10 <sup>-3</sup>  |
| FLNB   | 272460 | SPONDYLOCARPOTARSAL SYNOSTOSIS SYNDROME                         | 150250 | LARSEN SYNDROME, AUTOSOMAL DOMINANT                             | 0.00 | 1.00 | 7.94X10 <sup>-3</sup>  |
| GBA    | 230800 | GAUCHER DISEASE, TYPE I                                         | 230900 | GAUCHER DISEASE, TYPE II                                        | 0.75 | 0.94 | 3.07X10 <sup>-2</sup>  |
| GBA    | 231000 | GAUCHER DISEASE, TYPE III                                       | 230900 | GAUCHER DISEASE, TYPE II                                        | 0.63 | 0.94 | 3.98X10 <sup>-2</sup>  |
| GCK    | 125851 | MATURITY-ONSET DIABETES OF THE YOUNG, TYPE II                   | 602485 | FAMILIAL HYPERINSULINEMIC HYPOGLYCEMIA 3                        | 0.44 | 1.00 | 4.57X10 <sup>-2</sup>  |
| GCK    | 125851 | MATURITY-ONSET DIABETES OF THE YOUNG, TYPE II                   | 606176 | PERMANENT NEONATAL DIABETES MELLITUS                            | 0.44 | 0.71 | 3.20X10 <sup>-2</sup>  |
| GJB2   | 220290 | NEUROSENSORY DEAFNESS, AUTOSOMAL RECESSIVE 1                    | 148210 | KERATITIS-ICHTHYOSIS-DEAFNESS SYNDROME                          | 0.53 | 1.00 | 3.36X10 <sup>-2</sup>  |
| HEXA   | 272800 | TAY-SACHS DISEASE                                               | 230710 | GANGLIOSIDOSIS, GM2, JUVENILE, A(M)B VARIANT                    | 0.50 | 0.90 | 1.98X10 <sup>-2</sup>  |
| IKBKG  | 308300 | INCONTINENTIA PIGMENTI                                          | 300291 | HYPOHIDROTIC ECTODERMAL DYSPLASIA WITH IMMUNE DEFICIENCY        | 0.13 | 0.69 | 2.49X10 <sup>-4</sup>  |
| KCNQ1  | 220400 | JERVELL AND LANGE-NIELSEN SYNDROME                              | 192500 | LONG QT SYNDROME 1                                              | 0.38 | 0.84 | 5.50X10 <sup>-4</sup>  |
| KRT14  | 131900 | EPIDERMOLYSIS BULLOSA SIMPLEX, KOEBNER TYPE                     | 131760 | EPIDERMOLYSIS BULLOSA HERPETIFORMIS, DOWLING-MEARA TYPE         | 0.61 | 1.00 | 1.05X10 <sup>-2</sup>  |
| L1CAM  | 307000 | HYDROCEPHALUS DUE TO CONGENITAL STENOSIS OF AQUEDUCT OF SYLVIUS | 303350 | MASA SYNDROME                                                   | 0.32 | 0.64 | 1.93X10 <sup>-3</sup>  |
| LAMA3  | 226700 | JUNCTIONAL EPIDERMOLYSIS BULLOSA, HERLITZ TYPE                  | 226650 | JUNCTIONAL EPIDERMOLYSIS BULLOSA, NON-HERLITZ TYPE              | 0.00 | 0.44 | 1.72X10 <sup>-2</sup>  |
| LHCGR  | 152790 | GONADOTROPIN UNRESPONSIVENESS                                   | 176410 | MALE-LIMITED PRECOCIOUS PUBERTY                                 | 0.67 | 1.00 | 2.82X10 <sup>-2</sup>  |
| LRP5   | 259770 | OSTEOPOROSIS-PSEUDOGLIOMA SYNDROME                              | 133780 | EXUDATIVE VITREORETINOPATHY 1                                   | 0.50 | 0.82 | 4.02X10 <sup>-2</sup>  |
| MEN1   | 131100 | MULTIPLE ENDOCRINE NEOPLASIA, TYPE I                            | 145000 | HYPERPARATHYROIDISM 1                                           | 0.30 | 0.60 | 3.29X10 <sup>-3</sup>  |
| MLH1   | 609310 | HEREDITARY NONPOLYPOSIS COLORECTAL CANCER, TYPE 2               | 114500 | COLORECTAL CANCER                                               | 0.34 | 0.70 | 3.61X10 <sup>-2</sup>  |
| MRPL36 | 609054 | FANCONI ANEMIA, COMPLEMENTATION GROUP J                         | 114480 | BREAST CANCER                                                   | 0.40 | 1.00 | 3.38X10 <sup>-2</sup>  |
| MSH2   | 120435 | LYNCH SYNDROME I                                                | 137215 | GASTRIC CANCER                                                  | 0.32 | 0.83 | 1.59X10 <sup>-2</sup>  |
| MSH2   | 158320 | MUIR-TORRE SYNDROME                                             | 114500 | COLORECTAL CANCER                                               | 0.00 | 0.47 | 6.32X10 <sup>-3</sup>  |
| MSH2   | 158320 | MUIR-TORRE SYNDROME                                             | 137215 | GASTRIC CANCER                                                  | 0.00 | 0.83 | 3.87X10 <sup>-4</sup>  |

|              |        |                                                                                                           |        |                                                                                                                    |      |      |                       |
|--------------|--------|-----------------------------------------------------------------------------------------------------------|--------|--------------------------------------------------------------------------------------------------------------------|------|------|-----------------------|
| <i>MSH2</i>  | 158320 | MUIR-TORRE SYNDROME                                                                                       | 120435 | LYNCH SYNDROME I                                                                                                   | 0.00 | 0.32 | 6.95X10 <sup>-3</sup> |
| <i>MSH6</i>  | 600678 | HEREDITARY NONPOLYPOSIS COLORECTAL CANCER, TYPE 5                                                         | 114500 | COLORECTAL CANCER                                                                                                  | 0.25 | 0.54 | 2.54X10 <sup>-2</sup> |
| <i>NF1</i>   | 162200 | NEUROFIBROMATOSIS, TYPE I                                                                                 | 162210 | FAMILIAL SPINAL NEUROFIBROMATOSIS                                                                                  | 0.14 | 0.60 | 2.34X10 <sup>-2</sup> |
| <i>NF1</i>   | 162200 | NEUROFIBROMATOSIS, TYPE I                                                                                 | 601321 | NEUROFIBROMATOSIS-NOONAN SYNDROME                                                                                  | 0.14 | 0.57 | 1.03X10 <sup>-2</sup> |
| <i>PAX6</i>  | 106210 | ANIRIDIA, TYPE II                                                                                         | 165550 | BILATERAL OPTIC NERVE HYPOPLASIA                                                                                   | 0.22 | 0.88 | 2.49X10 <sup>-4</sup> |
| <i>PMP22</i> | 118220 | DEMYELINATING CHARCOT-MARIE TOOTH DISEASE, TYPE 1A                                                        | 145900 | HYPERTROPHIC NEUROPATHY OF DEJERINE-SOTTAS                                                                         | 0.58 | 0.95 | 8.36X10 <sup>-3</sup> |
| <i>PMP22</i> | 162500 | HEREDITARY NEUROPATHY WITH LIABILITY TO PRESSURE PALSIES                                                  | 145900 | HYPERTROPHIC NEUROPATHY OF DEJERINE-SOTTAS                                                                         | 0.31 | 0.95 | 1.58X10 <sup>-4</sup> |
| <i>POMC</i>  | 609734 | PROOPIOMELANOCORTIN DEFICIENCY                                                                            | 601665 | OBESITY                                                                                                            | 0.00 | 0.80 | 6.99X10 <sup>-3</sup> |
| <i>RAG1</i>  | 601457 | SEVERE COMBINED IMMUNODEFICIENCY, AUTOSOMAL RECESSIVE, T CELL-NEGATIVE, B CELL-NEGATIVE, NK CELL-POSITIVE | 603554 | OMENN SYNDROME                                                                                                     | 0.21 | 0.77 | 1.74X10 <sup>-3</sup> |
| <i>RAG1</i>  | 601457 | SEVERE COMBINED IMMUNODEFICIENCY, AUTOSOMAL RECESSIVE, T CELL-NEGATIVE, B CELL-NEGATIVE, NK CELL-POSITIVE | 179615 | ALPHA/BETA T-CELL LYMPHOPENIA WITH GAMMA/Delta T-CELL EXPANSION SEVERE CYTOMEGALOVIRUS INFECTION, AND AUTOIMMUNITY | 0.21 | 1.00 | 1.03X10 <sup>-3</sup> |
| <i>RET</i>   | 142623 | SUSCEPTIBILITY TO HIRSCHSPRUNG DISEASE 1                                                                  | 171400 | MULTIPLE ENDOCRINE NEOPLASIA, TYPE IIA                                                                             | 0.65 | 1.00 | 3.85X10 <sup>-5</sup> |
| <i>RET</i>   | 142623 | SUSCEPTIBILITY TO HIRSCHSPRUNG DISEASE 1                                                                  | 188550 | PAPILLARY THYROID CARCINOMA                                                                                        | 0.65 | 1.00 | 1.09X10 <sup>-5</sup> |
| <i>ROR2</i>  | 113000 | BRACHYDACTYLY, TYPE B1                                                                                    | 268310 | ROBINOW SYNDROME                                                                                                   | 0.00 | 0.45 | 4.45X10 <sup>-2</sup> |
| <i>SCN1A</i> | 607208 | SEVERE MYOCLONIC EPILEPSY OF INFANCY                                                                      | 604233 | GENERALIZED EPILEPSY WITH FEBRILE SEIZURES PLUS                                                                    | 0.51 | 1.00 | 1.08X10 <sup>-3</sup> |
| <i>SCN5A</i> | 113900 | PROGRESSIVE FAMILIAL HEART BLOCK, TYPE IA                                                                 | 603830 | LONG QT SYNDROME 3                                                                                                 | 0.76 | 1.00 | 8.13X10 <sup>-3</sup> |
| <i>SCN5A</i> | 601144 | BRUGADA SYNDROME 1                                                                                        | 603830 | LONG QT SYNDROME 3                                                                                                 | 0.77 | 1.00 | 6.26X10 <sup>-4</sup> |
| <i>SCN5A</i> | 603829 | PAROXYSMAL FAMILIAL VENTRICULAR FIBRILLATION                                                              | 603830 | LONG QT SYNDROME 3                                                                                                 | 0.60 | 1.00 | 1.22X10 <sup>-2</sup> |
| <i>SETX</i>  | 606002 | SPINOCEREBELLAR ATAXIA, AUTOSOMAL RECESSIVE 1                                                             | 602433 | JUVENILE AMYOTROPHIC LATERAL SCLEROSIS 4                                                                           | 0.33 | 1.00 | 3.25X10 <sup>-2</sup> |
| <i>VHL</i>   | 193300 | VON HIPPEL-LINDAU SYNDROME;                                                                               | 171300 | PHEOCHROMOCYTOMA                                                                                                   | 0.51 | 0.95 | 4.34X10 <sup>-5</sup> |
| <i>WFS1</i>  | 222300 | WOLFRAM SYNDROME 1                                                                                        | 600965 | NONSyndromic SENSORINEURAL DEAFNESS, AUTOSOMAL DOMINANT 6                                                          | 0.60 | 1.00 | 6.00X10 <sup>-4</sup> |
| <i>WT1</i>   | 136680 | FRASIER SYNDROME                                                                                          | 194080 | DENYS-DRASH SYNDROME                                                                                               | 0.17 | 0.78 | 7.79X10 <sup>-3</sup> |
| <i>WT1</i>   | 136680 | FRASIER SYNDROME                                                                                          | 256370 | EARLY-ONSET NEPHROTIC SYNDROME WITH DIFFUSE MESANGIAL SCLEROSIS                                                    | 0.17 | 1.00 | 1.52X10 <sup>-2</sup> |
| <i>WT1</i>   | 194070 | WILMS TUMOR 1                                                                                             | 194080 | DENYS-DRASH SYNDROME                                                                                               | 0.20 | 0.78 | 9.17X10 <sup>-6</sup> |
| <i>WT1</i>   | 194070 | WILMS TUMOR 1                                                                                             | 256370 | EARLY-ONSET NEPHROTIC SYNDROME WITH DIFFUSE MESANGIAL SCLEROSIS                                                    | 0.20 | 1.00 | 4.74X10 <sup>-4</sup> |

**Supplementary table 3.** Enrichment of in-frame disease mutations in different Pfam domains causing different disease

| Gene symbol   | OMIM ID | OMIM disease                               | Mode of Inheritance | Pfam domain (residues)   | Fold enrichment | P value                |
|---------------|---------|--------------------------------------------|---------------------|--------------------------|-----------------|------------------------|
| <i>COMP</i>   | 132400  | MULTIPLE EPIPHYSEAL DYSPLASIA 1            | autosomal dominant  | TSP 3 (1080-1116)        | 16.3            | 1.33X10 <sup>-4</sup>  |
|               | 132400  | MULTIPLE EPIPHYSEAL DYSPLASIA 1            | autosomal dominant  | TSP 3 (1188-1224)        | 9.5             | 2.50X10 <sup>-2</sup>  |
|               | 177170  | PSEUDOACHONDROPLASIA                       | autosomal dominant  | TSP 3 (1302-1347)        | 5.9             | 1.99X10 <sup>-2</sup>  |
|               | 177170  | PSEUDOACHONDROPLASIA                       | autosomal dominant  | TSP 3 (1371-1407)        | 6.1             | 4.32X10 <sup>-2</sup>  |
|               | 177170  | PSEUDOACHONDROPLASIA                       | autosomal dominant  | TSP 3 (1410-1455)        | 13.5            | 2.35X10 <sup>-7</sup>  |
|               | 177170  | PSEUDOACHONDROPLASIA                       | autosomal dominant  | TSP 3 (1518-1563)        | 13.5            | 2.35X10 <sup>-7</sup>  |
| <i>DMD</i>    | 300376  | MUSCULAR DYSTROPHY, BECKER TYPE            | unknown             | CH (405-720)             | 51.6            | 5.27X10 <sup>-3</sup>  |
|               | 310200  | MUSCULAR DYSTROPHY, DUCHENNE TYPE          | x-linked recessive  | ZZ (9921-10056)          | 22.5            | 1.41X10 <sup>-2</sup>  |
| <i>FLNA</i>   | 300049  | PERIVENTRICULAR HETEROTOPIA                | x-linked dominant   | CH (132-447)             | 18.3            | 4.99X10 <sup>-2</sup>  |
|               | 304120  | OTOPALATODIGITAL SYNDROME, TYPE II         | x-linked dominant   | CH (501-807)             | 33.7            | 1.79X10 <sup>-3</sup>  |
|               | 309350  | MELNICK-NEEDLES SYNDROME                   | x-linked dominant   | Filamin (3477-3738)      | Infinite        | 9.12X10 <sup>-4</sup>  |
|               | 311300  | OTOPALATODIGITAL SYNDROME, TYPE I          | x-linked dominant   | CH (501-807)             | Infinite        | 5.62X10 <sup>-5</sup>  |
| <i>PTPN11</i> | 151100  | LEOPARD SYNDROME 1                         | autosomal dominant  | Y phosphatase (819-1560) | Infinite        | 2.62X10 <sup>-3</sup>  |
|               | 163950  | NOONAN SYNDROME 1                          | autosomal dominant  | SH2 (18-243)             | 5.2             | 8.17X10 <sup>-6</sup>  |
| <i>RYR1</i>   | 117000  | CENTRAL CORE DISEASE OF MUSCLE             | autosomal dominant  | Iontrans (14421-14811)   | 37.8            | 2.41X10 <sup>-20</sup> |
|               | 145600  | SUSCEPTIBILITY TO MALIGNANT HYPERTHERMIA 1 | autosomal dominant  | RYDR ITPR (6471-7095)    | 7.5             | 4.28X10 <sup>-8</sup>  |
| <i>SCN5A</i>  | 601144  | BRUGADA SYNDROME 1                         | autosomal dominant  | Iontrans (477-1236)      | 2.6             | 1.77X10 <sup>-2</sup>  |
|               | 603830  | LONG QT SYNDROME 3                         | autosomal dominant  | Iontrans (4686-5313)     | 3.4             | 1.66X10 <sup>-2</sup>  |
| <i>SPTB</i>   | 130600  | ELLIPTOCYTOSIS, RHESUS-UNLINKED TYPE       | autosomal dominant  | Spectrin (6027-6210)     | Infinite        | 9.46X10 <sup>-9</sup>  |
|               | 182870  | SPHEROCYTOSIS, TYPE I                      | autosomal dominant  | CH (522-834)             | 19.7            | 3.88X10 <sup>-2</sup>  |
| <i>TP73L</i>  | 106260  | AEC SYNDROME                               | autosomal dominant  | SAM 2 (1506-1704)        | Infinite        | 3.21X10 <sup>-10</sup> |
|               | 129400  | RAPP-HODGKIN SYNDROME                      | autosomal dominant  | SAM 2 (1506-1704)        | Infinite        | 3.22X10 <sup>-3</sup>  |
|               | 604292  | EEC SYNDROME 3                             | autosomal dominant  | P53 (372-960)            | Infinite        | 3.52X10 <sup>-11</sup> |
| <i>WAS</i>    | 300299  | SEVERE CONGENITAL NEUTROPENIA, X-LINKED    | x-linked recessive  | PBD (711-888)            | Infinite        | 4.11X10 <sup>-2</sup>  |
|               | 313900  | THROMBOCYTOPENIA 1                         | x-linked recessive  | WH1 (117-435)            | 10.8            | 6.40X10 <sup>-23</sup> |

**Supplementary table 4. Primers used for cloning disease-causing mutant alleles**

| Gene            | Primer Type      | Primer Name                             | Sequence                                              |                                              |
|-----------------|------------------|-----------------------------------------|-------------------------------------------------------|----------------------------------------------|
| CBS             | attB1.1 forward  | CBS-F01                                 | GGGGACAACCTTTGTACAAAAAGTTGGCatgctctgagacccccag        |                                              |
|                 | attB2.1 reverse  | CBS-R01                                 | GGGGACAACCTTTGTACAAGAAAGTTGactctggctccgctcctg         |                                              |
|                 | forward internal | CBS-c146t-F                             | CBS-c146t-F                                           | GGATCCGGCCCGATGCTCTGAGCAGGTGCACCTGGC         |
|                 |                  | CBS-c434t-F                             | CBS-c434t-F                                           | CCCGGGGACACGATTATCGAGCTGACATCCGGGAACACCGGG   |
|                 |                  | CBS-t833c-F                             | CBS-t833c-F                                           | AGAAGTGTCTGGATGCAGGATCACTGGGGTGGATCCCGAAGGG  |
|                 |                  | CBS-c1265t-F                            | CBS-c1265t-F                                          | AGGAGCTGGGCTGTGACCCCTGCTGACCGTGTCTCCGACCA    |
|                 |                  | CBS-t1616c-F                            | CBS-t1616c-F                                          | CGGGGTGGTACCAGCCATTGACTCGTGAACCTCGTGGCCG     |
|                 | reverse internal | CBS-c146t-RM03                          | CBS-c146t-RM03                                        | TGCCAGGTGCACCTGCTCAGAGCATCGGGCCGGATCC        |
|                 |                  | CBS-c434t-RM06                          | CBS-c434t-RM06                                        | CCGGTGTTCGGGATGTCAGCTCGATAATCGTGTCCCGG       |
|                 |                  | CBS-t833c-RM09                          | CBS-t833c-RM09                                        | TGACCCTTCGGGATCCACCCAGTGCATCCTGCATCCAGGA     |
| CBS-c1265t-RM12 |                  | CBS-c1265t-RM12                         | TGGTCGGGAGCAGGTCAGCAGGGCTGACAGGCCAGCTCC               |                                              |
| CBS-t1616c-RM15 |                  | CBS-t1616c-RM15                         | CTGGGCGGCCACGAAGTTCAGCGAGTCAATGGCGGTGACCACC           |                                              |
| HGD             | attB1.1 forward  | HGD-F01                                 | GGGGACAACCTTTGTACAAAAAGTTGGCatggctgagtaaagtacattctgga |                                              |
|                 | attB2.1 reverse  | HGD-R01                                 | GGGGACAACCTTTGTACAAGAAAGTTGaattaggctctgctgggtcctg     |                                              |
|                 | forward internal | HGD-t74c-F                              | HGD-t74c-F                                            | AGGATCCTCGCTGCCAGGTTCCCcGCCAGAAGGACAGAATAATC |
|                 |                  | HGD-a125c-F                             | HGD-a125c-F                                           | GCCCTACAATCTCTATGCTGCGCAGCTCTCAGGATCGGC      |
|                 |                  | HGD-g674a-F                             | HGD-g674a-F                                           | CAATGGCTTGGCCAATCCTCATGATTTCTTGATACCCATTG    |
|                 |                  | HGD-t899g-F                             | HGD-t899g-F                                           | CAGACCCATCCATTTTACAGGATTGACTGCTAAGTCTG       |
|                 |                  | HGD-a1112g-F                            | HGD-a1112g-F                                          | ACAGCACAAATGACCCCGTGGACCTGATGCTGACTGCT       |
|                 | reverse internal | HGD-t74c-R                              | HGD-t74c-R                                            | TTATTCTGTCTTCTGGCGGGGAACCTGGGCAGCGAGGA       |
|                 |                  | HGD-a125c-R                             | HGD-a125c-R                                           | GCCGATCCTGAGAGCTGCGCAGCATAGAGATTGTAGG        |
|                 |                  | HGD-g674a-R                             | HGD-g674a-R                                           | ATGGGTATCAAGAAATCATGAGGATTGGCCAAGCCAT        |
| HGD-t899g-R     |                  | HGD-t899g-R                             | ACAGACTTAGCAGTCAATCCTGTGAAAATGGATGGGTCT               |                                              |
| HGD-a1112g-R    |                  | HGD-a1112g-R                            | CAGTCAGCATCAGTCCACGGGGGCTCATTGTGCTG                   |                                              |
| ACTG1           | attB1.1 forward  | ACTG1-F01                               | GGGGACAACCTTTGTACAAAAAGTTGGCatggaagaagagatcgcc        |                                              |
|                 | attB2.1 reverse  | ACTG1-R01                               | GGGGACAACCTTTGTACAAGAAAGTTGagaagcatttccggtggacg       |                                              |
|                 | forward internal | ACTG1-c266t-F                           | ACTG1-c266t-F                                         | AGAAGATCTGGCACACATCTTCTACAACGAGCTGCG         |
|                 |                  | ACTG1-a353t-F                           | ACTG1-a353t-F                                         | CCAAGGCCAACAGAGAGATGATGACTCAGATTATGTTT       |
|                 |                  | ACTG1-c791t-F                           | ACTG1-c791t-F                                         | CGGAGGCGCTGTTCCAGCTTCTCTTCTGGTATGGAAT        |
|                 |                  | ACTG1-c833t-F                           | ACTG1-c833t-F                                         | GCGGCATCCACGAGACCATCTTCACTCCATCATGAAGT       |
|                 |                  | ACTG1-c994g-F                           | ACTG1-c994g-F                                         | AAGATCAAGATCATCGCAGCCCCAGAGCCCAAGTACTCG      |
|                 | reverse internal | ACTG1-c266t-R                           | ACTG1-c266t-R                                         | CGCAGCTCGTTGTAGAAGATGTGGTGCCAGATCTTCTC       |
|                 |                  | ACTG1-a353t-R                           | ACTG1-a353t-R                                         | AACATAATCTGAGTCATCATCTCTCTGTGGCCCTTG         |
|                 |                  | ACTG1-c791t-R                           | ACTG1-c791t-R                                         | TCCATACCCAGGAAGGAAAGCTGGAACAGCGCCTCCG        |
| ACTG1-c833t-R   |                  | ACTG1-c833t-R                           | TTCATGATGGAGTTGAAGATGGTCTCGTGGATGCCG                  |                                              |
| ACTG1-c994g-R   |                  | ACTG1-c994g-R                           | AGTACTTGCCTCTGGGGCTGCGATGATCTTGATCTT                  |                                              |
| CDK4            | attB1.1 forward  | CDK4-F01                                | GGGGACAACCTTTGTACAAAAAGTTGGCatggctacctctgatatg        |                                              |
|                 | attB2.1 reverse  | CDK4-R01                                | GGGGACAACCTTTGTACAAGAAAGTTGactccggattacctctatcttat    |                                              |
|                 | forward internal | CDK4-c70t-F                             | CDK4-c70t-F                                           | GGGACAGTGTACAAGGCTGTGATCCCCACAGTGGC          |
|                 |                  | CDK4-g71a-F                             | CDK4-g71a-F                                           | GGACAGTGTACAAGGCCATGATCCCCACAGTGGCC          |
|                 |                  | CDK4-a122g-F                            | CDK4-a122g-F                                          | AGAGTGTGAGAGTCCCAAGTGGAGGAGGAGTGGAG          |
|                 |                  | CDK4-g155a-F                            | CDK4-g155a-F                                          | GAGGAGGCCCTTCCATCAACACAGTTCGTGAGGTGGCTT      |
|                 |                  | CDK4-c70t-R                             | CDK4-c70t-R                                           | GGCCACTGTGGGATCACAGGCCTTGTACACTGTCCCAT       |
|                 | reverse internal | CDK4-g71a-R                             | CDK4-g71a-R                                           | TGGCCACTGTGGGATCATGGGCTTGTACACTGTGTC         |
|                 |                  | CDK4-a122g-R                            | CDK4-a122g-R                                          | CCTCCACCTCCTCCTCACTGGGAGCATCTCACACTCTT       |
|                 |                  | CDK4-g155a-R                            | CDK4-g155a-R                                          | GCCACCTCACGAAGTGTGTTGATGGGAAGGCCTCCTC        |
| attB1.1 forward |                  | PRKAR1A-F01                             | GGGGACAACCTTTGTACAAAAAGTTGGCatggagctgagcagtagcc       |                                              |
| attB2.1 reverse |                  | PRKAR1A-R01                             | GGGGACAACCTTTGTACAAGAAAGTTGagacagacagtgacacaaaac      |                                              |
| PRKAR1A         | forward internal | PRKAR1A-c82t-F                          | PRKAR1A-c82t-F                                        | GTCCAGAAGCATAACATTTAAGCGCTGCTCAAAGAT         |
|                 |                  | PRKAR1A-c109t-F                         | PRKAR1A-c109t-F                                       | CTCAAAGATTCTATTGTGTAGTTGTGCACTGCTCGACC       |
|                 |                  | PRKAR1A-c124t-F                         | PRKAR1A-c124t-F                                       | GTGCAGTTGTGCACTGCTTGACCTGAGAGACCCATGGC       |
|                 |                  | PRKAR1A-a187t-F                         | PRKAR1A-a187t-F                                       | TTGGAGAAGGAGGAGGCATAACAGATTGAGAACTGTC        |
|                 |                  | PRKAR1A-c220t-F                         | PRKAR1A-c220t-F                                       | CTGCAGAAAGCAGGCCTTGTACAGACTCAAGGGAGGAT       |
|                 |                  | PRKAR1A-c289t-F                         | PRKAR1A-c289t-F                                       | GTAAAGGTAGGAGGCGATGAGGTGCTATCAGCGCTGAG       |
|                 |                  | PRKAR1A-c496t-F                         | PRKAR1A-c496t-F                                       | GCAGGAGAGACTGTGATTTAGCAAGGTGATGAAGGG         |
|                 |                  | PRKAR1A-c682t-F                         | PRKAR1A-c682t-F                                       | AAATTGTGGGCATCGACTGAGACAGCTATAGAAGAA         |
|                 |                  | PRKAR1A-c910t-F                         | PRKAR1A-c910t-F                                       | GGGTCAGCTGCTGTGCTATAACGTCGGTCAGAAAATGAA      |
|                 |                  | PRKAR1A-c920g-F                         | PRKAR1A-c920g-F                                       | CTGTGCTACAACGTCGGTGAGAAAATGAAGAGTTTGTT       |
|                 | reverse internal | PRKAR1A-c82t-R                          | PRKAR1A-c82t-R                                        | AATCTTTGAGCAGCGCTTAAATGTTATGCTTCTGGA         |
|                 |                  | PRKAR1A-c109t-R                         | PRKAR1A-c109t-R                                       | GTCGAGCAGTGCACAACCTACACAATGAACTCTTTGA        |
|                 |                  | PRKAR1A-c124t-R                         | PRKAR1A-c124t-R                                       | CCATGGGTCTCTCAGGTCAAGCAGTGCACAACCTGCACAA     |
|                 |                  | PRKAR1A-a187t-R                         | PRKAR1A-a187t-R                                       | GCAGATTCTGAATCTGTTATGCCTCCTCTCTCCAAAC        |
|                 |                  | PRKAR1A-c220t-R                         | PRKAR1A-c220t-R                                       | CCTCCCTTGAGTCTGTACAAGTGCCTGTTCTGCGAGAT       |
| PRKAR1A-c289t-R | PRKAR1A-c289t-R  | CAGCGCTGATGACACCTCATCGCCTCCTACCTTTAACC  |                                                       |                                              |
| PRKAR1A-c496t-R | PRKAR1A-c496t-R  | CCCCTTCATCACCTTGTCTAAATCACAGTCTCTCTGCGA |                                                       |                                              |
| PRKAR1A-c682t-R | PRKAR1A-c682t-R  | TTCTTCTATAGCTGTCTCAGTCTGATGCCCCACAATTT  |                                                       |                                              |
| PRKAR1A-c910t-R | PRKAR1A-c910t-R  | CATTTTCTGACCGACGTTATAGCACAGCAGCTGACC    |                                                       |                                              |
| PRKAR1A-c920g-R | PRKAR1A-c920g-R  | ACAAACTTTCATTTCTACCGACGTTGTAGCACAGCA    |                                                       |                                              |
